# Supplementary material for: 1029 genomes of self-declared healthy individuals from India reveal prevalent and clinically relevant cardiac ion channelopathy variants
Source: Hum Genomics. 2022 Aug 5;16:30. doi: 10.1186/s40246-022-00402-2 (PMC9354277; doi:10.1186/s40246-022-00402-2)
Supplement: Supplementary file 1 — Additional file 1: List of major genes associated with Cardiac Channelopathies. [file 40246_2022_402_MOESM1_ESM.xlsx]

## Sheet: Additional_File_1
Additional File 1. List of major genes associated with Cardiac Channelopathies
Gene	Mode of Inheritance	Transcript ID	HGNC ID	ClinGen disease association (Evidence)	OMIM Gene-Phenotype Relationships (OMIM ID)
ANK2	AD	NM_001148.6	493	AD CPVT(Disputed), AD BrS(Disputed)	Cardiac arrhythmia, ankyrin-B-related (600919); Long QT syndrome 4 (600919)
RYR2	AD	NM_001035.3	10484	AD CPVT(Definitive), AD HCM(Limited), AD ARVC(Refuted)	Arrhythmogenic right ventricular dysplasia 2 (600996); Ventricular arrhythmias due to cardiac ryanodine receptor calcium release deficiency syndrome (115000); Ventricular tachycardia, catecholaminergic polymorphic, 1 (604772)
AKAP9	AD	NM_005751.5	379	AD LQTS(Disputed)	Long QT syndrome 11 (611820)
PKP2	AD	NM_004572.4	9024	AD ARVC(Definitive), AD BrS(Disputed), AD DCM(Disputed), AD CPVT(Disputed)	Arrhythmogenic right ventricular dysplasia 9 (609040)
SCN5A	AD	NM_001099404.2	10593	AD BrS(Definitive), AD DCM(Definitive), AD LQTS(Definitive), AD ARVC(Limited), AD CPVT(Disputed), AD SQTS(Disputed)	Atrial fibrillation, familial, 10 (614022); Brugada syndrome 1 (601144); Cardiomyopathy, dilated, 1E (601154); Heart block, nonprogressive (113900); Heart block, progressive, type IA (113900); Long QT syndrome 3 (603830); Sick sinus syndrome 1 (608567); Ventricular fibrillation, familial, 1 (603829); {Sudden infant death syndrome, susceptibility to} (272120)
TRPM4	AD	NM_017636.4	17993	AD BrS(Disputed)	Progressive familial heart block, type IB (604559)
CACNA1C	AD	NM_000719.7	1390	AD LQTS(Moderate), AD BrS(Disputed), AD SQTS(Disputed), Timothy Syndrome(Definitive)	Brugada syndrome 3 (611875); Long QT syndrome 8 (618447); Timothy syndrome (601005)
CACNB2	AD	NM_201596.3	1402	AD SQTS(Disputed), AD BrS(Disputed)	Brugada syndrome 4 (611876)
KCNQ1	AD/AR	NM_000218.3	6294	AD LQTS(Definitive), AR JLNS(Definitive), AD BrS(Definitive),	Atrial fibrillation, familial, 3 (607554); Jervell and Lange-Nielsen syndrome (220400); Long QT syndrome 1 (192500); Short QT syndrome 2 (609621); {Long QT syndrome 1, acquired, susceptibility to} (192500)
CACNA2D1	AD	NM_000722.4	1399	AD BrS(Disputed), AD SQTS(Disputed)	NA
HCN4	AD	NM_005477.3	16882	AD BrS(Disputed)	Brugada syndrome 8 (613123); Sick sinus syndrome 2 (163800)
SCN10A	AD	NM_006514.4	10582	AD BrS(Disputed)	NA
SLMAP	AD	NM_001304420.3	16643	AD BrS(Disputed)	NA
ABCC9	AD	NM_005691.4	60	AD DCM(Limited)	Atrial fibrillation, familial, 12 (614050); Cardiomyopathy, dilated, 10 (608569)
CALM2	AD	NM_001743.6	1445	AD LQTS(Definitive), AD CPVT(Moderate)	Long QT syndrome 15 (616249)
CASQ2	AR/AD	NM_001232.4	1513	AR CPVT(Definitive), AD CPVT(Moderate)	Ventricular tachycardia, catecholaminergic polymorphic, 2 (611938)
KCND3	AD	NM_004980.5	6239	AD BrS(Disputed)	Brugada syndrome 9 (616399)
KCNH2	AD	NM_000238.4	6251	AD LQTS(Definitive), AD SQTS(Definitive), AD BrS(Disputed)	Long QT syndrome 2 (613688); Short QT syndrome 1 (609620); {Long QT syndrome 2, acquired, susceptibility to} (613688)
KCNJ2	AD	NM_000891.3	6263	AD SQTS(Moderate), AD LQTS(Limited), AD CPVT(Disputed), ATS(Definitive)	Andersen syndrome (170390), Atrial fibrillation, familial, 9 (613980), Short QT syndrome 3 (609622)
KCNJ5	AD	NM_000890.5	6266	AD LQTS(Disputed)	Long QT syndrome 13 (613485)
KCNJ8	AD	NM_004982.4	6269	AD BrS(Disputed)	Brugada Syndrome (601144)
SCN2B	AD	NM_004588.5	10589	AD BrS(Disputed)	Atrial fibrillation, familial, 14 (615378)
TRDN	AR	NM_006073.4	12261	AR CPVT(Definitive), AR LQTS(Strong)	Cardiac arrhythmia syndrome, with or without skeletal muscle weakness (615441)
CAV3	AD	NM_033337.3	1529	AD LQTS(Limited)	Cardiomyopathy, familial hypertrophic (192600); Long QT syndrome 9 (611818)
GPD1L	AD	NM_015141.4	28956	AD BrS(Disputed)	Brugada syndrome 2 (611777)
KCNE2	AD	NM_172201.2	6242	AD LQTS(Disputed), aLQTS(Strong)	Atrial fibrillation, familial, 4 (611493); Long QT syndrome 6 (613693)
KCNE5	AD	NM_012282.4	6241	AD BrS(Disputed)	NA
SCN3B	AD	NM_001040151.2	20665	AD BrS(Disputed)	Atrial fibrillation, familial, 16 (613120), Brugada syndrome 7 (613120)
SNTA1	AD	NM_003098.3	11167	AD LQTS(Disputed)	Long QT syndrome 12 (612955)
CALM1	AD	NM_006888.6	1442	AD LQTS(Definitive), AD CPVT(Moderate)	Long QT syndrome 14 (616247); Ventricular tachycardia, catecholaminergic polymorphic, 4 (614916)
CALM3	AD	NM_005184.4	1449	AD LQTS(Definitive), AD CPVT(Moderate)	Ventricular tachycardia, catecholaminergic polymorphic 6 (618782); Long QT syndrome 16 (618782)
KCNE1	AD/AR	NM_000219.6	6240	AR JLNS(Moderate), AD LQTS(Limited),aLQTS(Strong)	Jervell and Lange-Nielsen syndrome 2 (612347); Long QT syndrome 5 (613695)
KCNE3	AD	NM_005472.5	6243	AD BrS(Disputed)	Brugada syndrome 6 (613119)
RANGRF	AD	NM_016492.5	17679	AD BrS(Disputed)	NA
SCN1B	AD	NM_001037.5	10586	AD BrS(Disputed)	Atrial fibrillation, familial, 13 (615377); Brugada syndrome 5 (612838); Cardiac conduction defect, nonspecific (612838)
SCN4B	AD	NM_174934.4	10592	AD LQTS(Disputed)	Atrial fibrillation, familial, 17 (611819); Long QT syndrome 10 (611819)
AD: autosomal dominant; AR: autosomal recessive; HGNC ID: HUGO Gene Nomenclature Committee identifier; ClinGen: Clinical Genome Resource; OMIM- Online Mendelian Inheritance in Man; LQTS: Long QT Syndrome; SQTS: Short QT Syndrome; BrS: Brugada Syndrome; HCM: Hypertrophic Cardiomyopathy; DCM: Dilated Cardiomyopathy; CPVT: Catecholaminergic Ventricular Tachycardia; JLNS: Jervell and Lange-Nielsen Sy…
