# Supplementary material for: 1029 genomes of self-declared healthy individuals from India reveal prevalent and clinically relevant cardiac ion channelopathy variants
Source: Hum Genomics. 2022 Aug 5;16:30. doi: 10.1186/s40246-022-00402-2 (PMC9354277; doi:10.1186/s40246-022-00402-2)
Supplement: Supplementary file 5 — Additional file 5: List of 440 nonsynonymous variations with their ACMG/AMP classification. [file 40246_2022_402_MOESM5_ESM.xlsx]

## Sheet: Additional_File_5
Additional File 5. List of 440 nonsynonymous variations with their ACMG/AMP classification
Chr	Start	End	Ref	Alt	Gene	Variant Description	AA change	dbSNP ID	CLNSIG	SIFT_score	SIFT_converted_rankscore	SIFT_pred	Polyphen2_HDIV_score	Polyphen2_HDIV_rankscore	Polyphen2_HDIV_pred	Polyphen2_HVAR_score	Polyphen2_HVAR_rankscore	Polyphen2_HVAR_pred	CADD_raw	CADD_raw_rankscore	CADD_phred	1000g2015aug_all	1000g2015aug_sas	gnomAD_exome_ALL	gnomAD_exome_SAS	gnomAD_genome_All	gnomAD_genome_SAS	ExAC_ALL	ExAC_SAS	esp6500siv2_all	GME_AF	ACMG Attributes	ACMG annotation
chr1	111777095	111777095	C	T	KCND3	NM_004980.5:c.1697G>A	p.R566H	rs761867267	Uncertain_significance	0.324	0.141	T	0.017	0.163	B	0.006	0.112	B	5.608	0.764	26.5	.	.	8.13e-06	0	6.98e-06	0	8.24e-06	0	.	.	PM2PP2BP4PM1	VUS
chr1	111777143	111777143	C	T	KCND3	NM_004980.5:c.1649G>A	p.R550H	rs151164490	Uncertain_significance	0.004	0.721	D	0.991	0.899	D	0.91	0.739	D	7.554	0.953	34	.	.	4.47e-05	0.0001	4.19e-05	0	4.12e-05	6.06e-05	.	.	PM1PM2PP2PP3	Likely Pathogenic(V)
chr1	111780713	111780713	G	A	KCND3	NM_004980.5:c.1348C>T	p.L450F	rs150401343	Conflicting_interpretations_of_pathogenicity	0.278	0.222	T	0.025	0.204	B	0.033	0.237	B	4.189	0.561	23.8	.	.	0.0001	0.0001	6.98e-05	0.0003	0.0002	0.0002	.	0.00455	PS3PM2PP2BP4	Likely Pathogenic(II)
chr1	111780719	111780719	C	T	KCND3	NM_004980.5:c.1342G>A	p.G448R	rs750200535	NA	0.047	0.403	D	0.208	0.337	B	0.052	0.341	B	6.206	0.857	28.7	.	.	4.11e-06	3.35e-05	1.4e-05	0	1.06e-05	7.98e-05	.	.	PM2PP2PP3	VUS
chr1	111780770	111780770	G	A	KCND3	NM_004980.5:c.1291C>T	p.R431C	rs777183510	NA	0	0.912	D	1	0.899	D	0.973	0.713	D	7.411	0.951	34	.	.	4.09e-06	3.3e-05	.	.	9.45e-06	7.36e-05	.	.	PM2PP2PP3	VUS
chr1	111982247	111982247	C	T	KCND3	NM_004980.5:c.480G>A	p.M160I	.	NA	0.434	0.095	T	0	0.026	B	0	0.013	B	2.119	0.316	16.98	.	.	.	.	.	.	.	.	.	.	PM2PP2BP4	VUS
chr1	111982402	111982402	C	G	KCND3	NM_004980.5:c.325G>C	p.E109Q	.	NA	0.004	0.654	D	0.852	0.45	P	0.574	0.482	P	5.369	0.727	25.9	.	.	.	.	.	.	.	.	.	.	PM1PM2PP2PP3	Likely Pathogenic(V)
chr1	115701383	115701383	G	C	CASQ2	NM_001232.4:c.1058C>G	p.P353R	.	NA	0.003	0.682	D	1	0.899	D	0.997	0.85	D	5.468	0.742	26.2	.	.	.	.	.	.	.	.	.	.	PM1PM2PP3BP1	VUS
chr1	115705203	115705203	C	T	CASQ2	NM_001232.4:c.928G>A	p.D310N	rs141314684	Conflicting_interpretations_of_pathogenicity	0.118	0.281	T	0.485	0.35	P	0.235	0.367	B	4.702	0.63	24.6	.	.	0.0007	0.0016	0.0004	0.0013	0.0006	0.0011	0.0005	0.001512	PM1BP1BP4	Likely Benign(II)
chr1	115705282	115705282	T	G	CASQ2	NM_001232.4:c.849A>C	p.E283D	rs759205292	NA	0.028	0.461	D	0.993	0.637	D	0.909	0.628	D	5.99	0.823	27.8	.	.	1.63e-05	0.0001	.	.	1.67e-05	0.0001	.	.	PM1PM2PP3BP1	VUS
chr1	115725533	115725533	C	T	CASQ2	NM_001232.4:c.758G>A	p.R253H	rs199571249	Uncertain_significance	0.028	0.461	D	0.165	0.271	B	0.068	0.268	B	5.979	0.822	27.8	0.000399	.	8.65e-05	0.0001	8.18e-05	0	8.29e-05	0.0002	.	.	PM1PM2PP3BP1	VUS
chr1	115727022	115727022	T	A	CASQ2	NM_001232.4:c.707A>T	p.E236V	.	NA	0.001	0.784	D	0.286	0.305	B	0.11	0.299	B	4.516	0.605	24.3	.	.	.	.	.	.	.	.	.	.	PM1PM2PP3BP1	VUS
chr1	115738278	115738278	G	A	CASQ2	NM_001232.4:c.478C>T	p.R160C	rs750680032	Uncertain_significance	0.019	0.501	D	1	0.899	D	0.973	0.713	D	7.772	0.955	35	.	.	2.03e-05	0	2.09e-05	0	1.65e-05	0	.	.	PM1PM2PP3BP1	VUS
chr1	237369580	237369580	T	C	RYR2	NM_001035.3:c.356T>C	p.I119T	.	NA	0.001	0.784	D	0.01	0.144	B	0.015	0.162	B	4.177	0.56	23.8	.	.	.	.	.	.	.	.	.	.	PM1PM2PP2PP3	Likely Pathogenic(V)
chr1	237388155	237388155	T	C	RYR2	NM_001035.3:c.745T>C	p.S249P	.	NA	0.082	0.332	T	0.998	0.715	D	0.943	0.662	D	4.355	0.583	24.1	.	.	.	.	.	.	.	.	.	.	PM1PM2PP2PP3	Likely Pathogenic(V)
chr1	237423135	237423135	C	T	RYR2	NM_001035.3:c.892C>T	p.R298C	rs551099887	Conflicting_interpretations_of_pathogenicity	0.05	0.395	D	0.999	0.764	D	0.939	0.657	D	4.6	0.616	24.4	0.0002	.	8.95e-05	0.0002	0.0002	0	0.0001	0.0004	.	.	PM1PM2PP2PP3	Likely Pathogenic(V)
chr1	237441465	237441465	G	A	RYR2	NM_001035.3:c.1152G>A	p.M384I	.	NA	0.235	0.18	T	0.483	0.349	P	0.163	0.332	B	3.447	0.472	23	.	.	.	.	.	.	.	.	.	.	PM1PM2PP2BP4	VUS
chr1	237454494	237454494	C	T	RYR2	NM_001035.3:c.1396C>T	p.P466S	.	NA	0.004	0.654	D	0.99	0.615	D	0.828	0.577	P	4.733	0.635	24.6	.	.	.	.	.	.	.	.	.	.	PM1PM2PP2PP3	Likely Pathogenic(V)
chr1	237493036	237493036	T	G	RYR2	NM_001035.3:c.1910T>G	p.L637R	.	NA	0	0.912	D	0.999	0.764	D	0.999	0.916	D	6.091	0.839	28.2	.	.	.	.	.	.	.	.	.	.	PM1PM2PP2PP3	Likely Pathogenic(V)
chr1	237493066	237493066	G	A	RYR2	NM_001035.3:c.1940G>A	p.R647H	rs766330093	Uncertain_significance	0.022	0.486	D	0.999	0.764	D	0.945	0.664	D	7.362	0.95	34	.	.	1.63e-05	6.53e-05	2.09e-05	0	1.75e-05	0	.	.	PM1PM2PP2PP3	Likely Pathogenic(V)
chr1	237496653	237496653	G	A	RYR2	NM_001035.3:c.2104G>A	p.G702R	rs569386030	Uncertain_significance	0.001	0.784	D	1	0.899	D	1	0.971	D	6.295	0.869	29.1	0.0002	0.001	7.31e-05	0.0006	.	.	4.14e-05	0.0003	.	.	PM1PP2PP3	VUS
chr1	237550628	237550628	C	T	RYR2	NM_001035.3:c.3151C>T	p.R1051C	rs533330664	Conflicting_interpretations_of_pathogenicity	0.347	0.124	T	0.999	0.764	D	0.905	0.625	P	3.64	0.495	23.2	.	.	9.73e-05	0.0006	2.79e-05	0.001	0.0002	0.0007	.	.	PM1PP2PP3	VUS
chr1	237566732	237566732	A	G	RYR2	NM_001035.3:c.3380A>G	p.E1127G	rs200525962	Conflicting_interpretations_of_pathogenicity	0.014	0.531	D	0.979	0.571	D	0.675	0.514	P	6.511	0.897	31	0.000599	0.0031	0.0011	0.0056	0.0006	0.0046	0.0011	0.0056	0.0006	0.004028	PM1PP2PP3	VUS
chr1	237589929	237589929	G	T	RYR2	NM_001035.3:c.3735G>T	p.R1245S	.	NA	0.002	0.721	D	0.002	0.09	B	0.004	0.093	B	3.635	0.494	23.2	.	.	.	.	.	.	.	.	.	.	PM2PP2PP3	VUS
chr1	237590980	237590980	G	A	RYR2	NM_001035.3:c.4148G>A	p.R1383H	rs752124839	NA	0.056	0.381	T	0.007	0.131	B	0.001	0.04	B	4.112	0.552	23.7	.	.	2.06e-05	6.55e-05	2.79e-05	0.0003	8.75e-06	6.75e-05	.	.	PM2PP2BP4	VUS
chr1	237590982	237590982	C	G	RYR2	NM_001035.3:c.4150C>G	p.L1384V	.	NA	0.152	0.244	T	0	0.026	B	0.001	0.04	B	1.893	0.288	15.54	.	.	.	.	.	.	.	.	.	.	PM2PP2BP4	VUS
chr1	237591797	237591797	G	A	RYR2	NM_001035.3:c.4219G>A	p.E1407K	.	Uncertain_significance	0.322	0.135	T	0.096	0.239	B	0.019	0.176	B	3.733	0.506	23.3	.	.	4.07e-06	0	.	.	.	.	.	.	PM2PP2BP4	VUS
chr1	237593588	237593588	G	A	RYR2	NM_001035.3:c.4388G>A	p.R1463H	rs753707154	NA	0.082	0.332	T	0.999	0.764	D	0.824	0.575	P	4.613	0.618	24.4	.	.	1.63e-05	9.75e-05	6.99e-06	0	4.98e-05	0.0004	.	.	PM1PM2PP2PP3	Likely Pathogenic(V)
chr1	237595592	237595592	G	T	RYR2	NM_001035.3:c.4531G>T	p.V1511L	.	Uncertain_significance	0.043	0.413	D	0.959	0.532	D	0.81	0.568	P	5.319	0.72	25.8	.	.	.	.	.	.	.	.	.	.	PM1PM2PP2PP3	Likely Pathogenic(V)
chr1	237602080	237602080	A	G	RYR2	NM_001035.3:c.4652A>G	p.N1551S	rs185237690	Conflicting_interpretations_of_pathogenicity	0.295	0.147	T	0.659	0.39	P	0.401	0.427	B	4.208	0.564	23.9	.	.	0.0003	0	0.0002	0	0.0004	0	.	.	PM1PM2PP2BP4	VUS
chr1	237610771	237610771	C	G	RYR2	NM_001035.3:c.4693C>G	p.P1565A	rs778783933	Conflicting_interpretations_of_pathogenicity	0.001	0.784	D	0.983	0.585	D	0.656	0.508	P	5.972	0.821	27.7	.	.	0.0001	0.0009	2.09e-05	0.001	0.0003	0.0015	.	.	PP2PP3	VUS
chr1	237610832	237610832	G	A	RYR2	NM_001035.3:c.4754G>A	p.R1585H	.	Uncertain_significance	0	0.912	D	1	0.899	D	0.959	0.685	D	7.541	0.953	34	.	.	8.2e-06	3.29e-05	6.98e-06	0	.	.	.	.	PM2PP2PP3	VUS
chr1	237610918	237610918	C	T	RYR2	NM_001035.3:c.4840C>T	p.R1614C	rs373079767	Uncertain_significance	0.172	0.226	T	1	0.899	D	0.854	0.591	P	6.407	0.885	29.6	0.0002	.	2.85e-05	0	6.98e-06	0	5.41e-05	0	.	.	PM2PP2PP3	VUS
chr1	237610919	237610919	G	A	RYR2	NM_001035.3:c.4841G>A	p.R1614H	rs746943081	Uncertain_significance	0.526	0.071	T	0.999	0.764	D	0.854	0.591	P	4.298	0.576	24	.	.	2.04e-05	0	6.98e-06	0	1.8e-05	0	.	.	PM2PP2PP3	VUS
chr1	237614103	237614103	C	T	RYR2	NM_001035.3:c.4975C>T	p.R1659W	.	NA	0.003	0.682	D	1	0.899	D	0.947	0.667	D	6.869	0.93	33	.	.	.	.	6.98e-06	0	.	.	.	.	PM2PP2PP3	VUS
chr1	237614425	237614425	C	T	RYR2	NM_001035.3:c.5297C>T	p.P1766L	.	NA	0.026	0.469	D	0.011	0.147	B	0.009	0.133	B	3.478	0.476	23.1	.	.	.	.	.	.	.	.	.	.	PM2PP2PP3	VUS
chr1	237614637	237614637	G	A	RYR2	NM_001035.3:c.5509G>A	p.E1837K	rs749184443	Uncertain_significance	0.096	0.31	T	0.483	0.349	P	0.09	0.283	B	3.847	0.519	23.4	.	.	2.04e-05	6.5e-05	.	.	3.32e-05	6.07e-05	.	.	PM2PP2BP4	VUS
chr1	237614808	237614808	C	A	RYR2	NM_001035.3:c.5680C>A	p.L1894I	rs555692728	Conflicting_interpretations_of_pathogenicity	0.005	0.632	D	0.97	0.55	D	0.527	0.466	P	5.92	0.812	27.5	0.000399	0.002	0.0004	0.0035	4.89e-05	0.002	0.0004	0.004	.	.	PP2PP3	VUS
chr1	237617344	237617344	T	C	RYR2	NM_001035.3:c.5774T>C	p.I1925T	rs761505396	Uncertain_significance	0.001	0.784	D	0.745	0.412	P	0.298	0.392	B	4.262	0.571	23.9	.	.	3.26e-05	0	3.49e-05	0.0003	3.43e-05	0	.	0.002518	PM2PP2PP3	VUS
chr1	237623826	237623826	G	A	RYR2	NM_001035.3:c.5978G>A	p.R1993H	rs551362343	Uncertain_significance	0.01	0.564	D	0.951	0.52	P	0.161	0.331	B	5.11	0.689	25.3	0.0002	0.001	1.63e-05	6.5e-05	6.99e-06	0	1.66e-05	6.07e-05	.	.	PP2PP3	VUS
chr1	237627938	237627938	C	T	RYR2	NM_001035.3:c.6298C>T	p.R2100W	rs753164125	Uncertain_significance	0	0.912	D	0.998	0.715	D	0.79	0.559	P	7.697	0.954	35	.	.	2.03e-05	0	7.01e-06	0.0003	1.66e-05	0	.	.	PM2PP2PP3	VUS
chr1	237627939	237627939	G	A	RYR2	NM_001035.3:c.6299G>A	p.R2100Q	rs796202631	Uncertain_significance	0.231	0.182	T	0.051	0.21	B	0.026	0.195	B	3.908	0.527	23.5	.	.	1.63e-05	0	3.5e-05	0	.	.	.	.	PM2PP2BP4	VUS
chr1	237627960	237627960	C	T	RYR2	NM_001035.3:c.6320C>T	p.T2107M	rs370331492	Uncertain_significance	0.012	0.546	D	1	0.899	D	0.98	0.732	D	5.748	0.785	27	0.0002	.	8.94e-05	0.0001	6.99e-05	0.0003	4.98e-05	0.0001	8.1e-05	.	PM2PP2PP3	VUS
chr1	237628007	237628007	C	T	RYR2	NM_001035.3:c.6367C>T	p.L2123F	rs1060500159	Uncertain_significance	0.001	0.784	D	1	0.899	D	1	0.971	D	5.286	0.715	25.7	.	.	4.07e-06	0	.	.	.	.	.	.	PM1PM2PP2PP3	Likely Pathogenic(V)
chr1	237648591	237648591	G	A	RYR2	NM_001035.3:c.7490G>A	p.R2497Q	.	NA	0.048	0.4	D	1	0.899	D	0.997	0.85	D	4.677	0.627	24.5	.	.	.	.	.	.	.	.	.	.	PM2PP2PP3	VUS
chr1	237649981	237649981	G	C	RYR2	NM_001035.3:c.7617G>C	p.E2539D	.	NA	0.265	0.163	T	0.265	0.299	B	0.08	0.274	B	2.373	0.346	18.64	.	.	.	.	.	.	.	.	.	.	PM2PP2BP4	VUS
chr1	237651484	237651484	G	A	RYR2	NM_001035.3:c.7807G>A	p.A2603T	rs59331340	Conflicting_interpretations_of_pathogenicity	1	0.01	T	0.282	0.304	B	0.027	0.198	B	2.24	0.33	17.77	0.000799	0.002	0.0001	0.0003	6.98e-06	0	0.0001	0.0003	8.4e-05	.	PP2BP4	VUS
chr1	237660918	237660918	C	T	RYR2	NM_001035.3:c.8407C>T	p.R2803W	rs754674622	Uncertain_significance	0.006	0.614	D	0.997	0.689	D	0.776	0.553	P	7.319	0.949	34	.	.	2.41e-05	5.78e-05	2.1e-05	0	9.18e-05	0	.	.	PM2PP2PP3	VUS
chr1	237666525	237666525	C	T	RYR2	NM_001035.3:c.8450C>T	p.A2817V	rs765782802	Uncertain_significance	0.115	0.285	T	0.007	0.131	B	0.008	0.127	B	2.98	0.418	22.2	.	.	3.69e-05	0.0002	2.09e-05	0.0003	5.02e-05	0.0002	.	.	PM2PP2BP4	VUS
chr1	237700291	237700291	C	A	RYR2	NM_001035.3:c.9191C>A	p.A3064D	.	NA	0.003	0.682	D	1	0.899	D	0.988	0.764	D	6.846	0.928	33	.	.	.	.	.	.	.	.	.	.	PM2PP2PP3	VUS
chr1	237702044	237702044	G	C	RYR2	NM_001035.3:c.9434G>C	p.S3145T	.	NA	0.536	0.069	T	0.539	0.36	P	0.057	0.248	B	2.552	0.368	19.8	.	.	.	.	.	.	.	.	.	.	PM2PP2BP4	VUS
chr1	237706969	237706969	G	A	RYR2	NM_001035.3:c.9601G>A	p.V3201M	rs762549821	Conflicting_interpretations_of_pathogenicity	0.472	0.084	T	0.892	0.471	P	0.679	0.516	P	4.596	0.616	24.4	.	.	0.0002	0.0015	6.98e-06	0.0003	0.0002	0.0012	.	0.000504	PP2PP3	VUS
chr1	237707146	237707146	C	T	RYR2	NM_001035.3:c.9778C>T	p.R3260W	rs765325906	Uncertain_significance	0.014	0.531	D	0.953	0.523	P	0.46	0.446	P	3.182	0.442	22.7	.	.	4.88e-05	9.75e-05	6.99e-06	0	4.15e-05	0.0001	.	.	PM2PP2PP3	VUS
chr1	237726292	237726292	G	A	RYR2	NM_001035.3:c.10709G>A	p.R3570Q	rs751520590	Uncertain_significance	0.185	0.215	T	0.185	0.276	B	0.018	0.173	B	2.228	0.329	17.69	.	.	3.14e-05	0.0001	4.19e-05	0.0007	2.06e-05	0.0001	.	.	PP2BP4	VUS
chr1	237730334	237730334	A	C	RYR2	NM_001035.3:c.10913A>C	p.D3638A	rs1064793255	Uncertain_significance	0.018	0.506	D	0.857	0.512	P	0.345	0.508	B	4.25	0.569	23.9	.	.	.	.	.	.	.	.	.	.	PM2PP2PP3	VUS
chr1	237732062	237732062	C	A	RYR2	NM_001035.3:c.10952C>A	p.P3651H	.	NA	0.057	0.379	T	0.902	0.67	P	0.547	0.587	P	2.361	0.345	18.57	.	.	.	.	6.99e-06	0	.	.	.	.	PM2PP2PP3	VUS
chr1	237733742	237733742	G	C	RYR2	NM_001035.3:c.11077G>C	p.D3693H	.	NA	0.091	0.318	T	0.966	0.899	D	0.784	0.728	P	6.694	0.916	32	.	.	.	.	.	.	.	.	.	.	PM2PP2PP3	VUS
chr1	237773631	237773631	C	A	RYR2	NM_001035.3:c.11758C>A	p.L3920I	.	NA	0	0.912	D	0.999	0.764	D	0.997	0.85	D	7.105	0.942	34	.	.	.	.	.	.	.	.	.	.	PM1PM2PP2PP3	Likely Pathogenic(V)
chr1	237783884	237783884	T	A	RYR2	NM_001035.3:c.12172T>A	p.Y4058N	.	NA	0	0.912	D	1	0.899	D	0.999	0.916	D	6.262	0.865	29	.	.	.	.	.	.	.	.	.	.	PM2PP2PP3	VUS
chr1	237783995	237783995	G	A	RYR2	NM_001035.3:c.12283G>A	p.G4095S	rs753850982	Likely_pathogenic	0	0.912	D	0.13	0.383	B	0.088	0.298	B	3.547	0.484	23.1	.	.	8.16e-06	6.5e-05	6.98e-06	0	8.47e-06	6.12e-05	.	.	PM2PP2PP3PP5	VUS
chr1	237784631	237784631	C	T	RYR2	NM_001035.3:c.12919C>T	p.R4307C	rs200092869	Conflicting_interpretations_of_pathogenicity	0.176	0.223	T	0.998	0.715	D	0.794	0.561	P	4.5	0.602	24.3	.	.	0.0003	0	0.0004	0	0.0002	0	0.0007	.	PP2PP3	VUS
chr1	237784944	237784944	C	T	RYR2	NM_001035.3:c.13232C>T	p.P4411L	.	NA	0.246	0.173	T	0.999	0.764	D	0.995	0.818	D	1.283	0.219	12.18	.	.	4.51e-06	3.52e-05	.	.	.	.	.	.	PM1PM2PP2BP4	VUS
chr1	237788010	237788010	G	A	RYR2	NM_001035.3:c.13351G>A	p.E4451K	rs780734342	Uncertain_significance	0.252	0.17	T	0.017	0.163	B	0.042	0.227	B	2.627	0.377	20.4	.	.	1.81e-05	0	1.4e-05	0	3.94e-05	0	.	.	PM1PM2PP2BP4	VUS
chr1	237791478	237791478	T	C	RYR2	NM_001035.3:c.13526T>C	p.V4509A	.	Uncertain_significance	0.002	0.721	D	0.58	0.369	P	0.242	0.37	B	5.833	0.799	27.2	.	.	1.02e-05	7.82e-05	.	.	.	.	.	.	PM1PM2PP2PP3	Likely Pathogenic(V)
chr2	47161784	47161784	T	A	CALM2	NM_001743.6:c.360A>T	p.E120D	.	NA	0.02	0.524	D	.	.	.	.	.	.	1.673	0.262	14.25	.	.	.	.	.	.	.	.	.	.	PM2PP2BP4	VUS
chr2	47176472	47176472	C	A	CALM2	NM_001305624.1:c.70G>T	p.A24S	.	NA	0.113	0.287	T	.	.	.	.	.	.	2.902	0.409	21.9	.	.	.	.	.	.	.	.	.	.	PM2PP2BP4	VUS
chr2	47176480	47176480	C	A	CALM2	NM_001305624.1:c.62G>T	p.C21F	rs748018981	NA	0.013	0.538	D	.	.	.	.	.	.	3.135	0.436	22.6	.	.	8.16e-06	0	.	.	9.15e-06	0	.	.	PM2PP2PP3	VUS
chr3	8733931	8733931	T	C	CAV3	NM_033337.3:c.55T>C	p.C19R	rs760170984	Uncertain_significance	0.325	0.133	T	0.001	0.067	B	0	0.013	B	1.831	0.281	15.17	.	.	2.44e-05	0.0002	.	.	2.5e-05	0.0001	.	.	PM1PM2PP2BP4	VUS
chr3	8745627	8745627	C	G	CAV3	NM_033337.3:c.216C>G	p.C72W	rs116840776	Conflicting_interpretations_of_pathogenicity	0.095	0.312	T	0.496	0.352	P	0.512	0.462	P	4.285	0.574	24	0.000998	.	0.0014	0.0022	0.0016	0.002	0.0011	0.0019	0.0014	0.000504	PM1PP2PP3	VUS
chr3	8745655	8745655	G	T	CAV3	NM_033337.3:c.244G>T	p.V82F	.	NA	0.004	0.654	D	0.969	0.548	D	0.864	0.597	P	3.904	0.526	23.5	.	.	.	.	.	.	.	.	.	.	PM1PM2PP2PP3	Likely Pathogenic(V)
chr3	32128127	32128127	A	T	GPD1L	NM_015141.4:c.99A>T	p.K33N	rs779017611	NA	0.623	0.06	T	0.006	0.126	B	0.01	0.139	B	2.768	0.394	21.2	.	.	0.0002	0.0015	4.19e-05	0.002	0.0002	0.0017	.	.	PM1BP4	VUS
chr3	32138659	32138659	A	C	GPD1L	NM_015141.4:c.298A>C	p.I100L	.	NA	0.555	0.079	T	0.218	0.285	B	0.313	0.397	B	3.295	0.455	22.8	.	.	.	.	.	.	.	.	.	.	PM1PM2BP4	VUS
chr3	32158961	32158961	T	A	GPD1L	NM_015141.4:c.704T>A	p.M235K	rs776751619	NA	0.167	0.231	T	0.047	0.206	B	0.156	0.328	B	3.442	0.472	23	.	.	8.13e-06	6.5e-05	.	.	1.65e-05	0.0001	.	.	PM1PM2BP4	VUS
chr3	32165889	32165889	G	T	GPD1L	NM_015141.4:c.1035G>T	p.Q345H	rs780760018	Uncertain_significance	0.005	0.632	D	0.985	0.592	D	0.717	0.529	P	4.365	0.584	24.1	.	.	0.0004	0.0029	4.89e-05	0.0023	0.0004	0.0027	.	.	PP3	VUS
chr3	38550326	38550326	C	T	SCN5A	NM_001099404.2:c.6046G>A	p.V2016M	rs762981322	Conflicting_interpretations_of_pathogenicity	0.001	0.912	D	0.994	0.899	D	0.561	0.807	P	5.054	0.681	25.2	.	.	3.35e-05	0.0003	4.19e-05	0	3.7e-05	0.0003	.	.	PS3PM2PP3	Likely Pathogenic(II)
chr3	38550679	38550679	C	T	SCN5A	NM_001099404.2:c.5693G>A	p.R1898H	rs370694515	Conflicting_interpretations_of_pathogenicity	0.042	0.419	D	0.896	0.899	P	0.126	0.782	B	6.034	0.83	28	.	.	4.47e-05	0.0002	2.79e-05	0.0007	6.62e-05	0.0002	0.0002	.	PS3PP3	VUS
chr3	38550683	38550683	G	A	SCN5A	NM_001099404.2:c.5689C>T	p.R1897W	rs45465995	Uncertain_significance	0	0.912	D	1	0.899	D	0.973	0.832	D	5.514	0.749	26.3	0.000599	.	9.34e-05	3.25e-05	9.07e-05	0	9.94e-05	0	0.0002	.	PP3	VUS
chr3	38550848	38550848	T	A	SCN5A	NM_001099404.2:c.5524A>T	p.M1842L	rs368967393	Uncertain_significance	0.15	0.251	T	0.003	0.267	B	0.012	0.457	B	1.981	0.299	16.09	.	.	8.13e-06	3.25e-05	.	.	8.28e-06	0	7.9e-05	.	PM2BP4	VUS
chr3	38550917	38550917	C	T	SCN5A	NM_001099404.2:c.5455G>A	p.D1819N	rs137854619	Conflicting_interpretations_of_pathogenicity	0.009	0.574	D	0.94	0.715	P	0.722	0.782	P	5.624	0.766	26.6	.	.	0.0003	0.0018	7.68e-05	0.0007	0.0003	0.002	.	0.000504	PP3	VUS
chr3	38550920	38550920	C	T	SCN5A	NM_001099404.2:c.5452G>A	p.A1818T	.	NA	0.001	0.912	D	0.98	0.899	D	0.963	0.875	D	6.347	0.876	29.3	.	.	.	.	.	.	.	.	.	.	PM2PP3	VUS
chr3	38554525	38554525	C	T	SCN5A	NM_001099404.2:c.4567G>A	p.D1523N	rs777254969	Uncertain_significance	0.017	0.512	D	0.994	0.67	D	0.891	0.619	P	7.055	0.94	33	.	.	4.07e-05	0.0002	1.4e-05	0	4.98e-05	0.0002	.	.	PM2PP3	VUS
chr3	38555663	38555663	C	T	SCN5A	NM_001099404.2:c.4535G>A	p.R1512Q	rs368219299	Uncertain_significance	0	0.912	D	1	0.899	D	0.997	0.85	D	7.606	0.954	34	.	.	2.44e-05	3.25e-05	2.79e-05	0	2.48e-05	0	0.0002	.	PM2PP3	VUS
chr3	38556527	38556527	C	G	SCN5A	NM_001099404.2:c.4351G>C	p.V1451L	rs876657996	Uncertain_significance	0.001	0.784	D	1	0.899	D	0.995	0.818	D	6.447	0.89	29.8	.	.	4.08e-06	3.3e-05	.	.	.	.	.	.	PM1PM2PP3	VUS
chr3	38575386	38575386	G	A	SCN5A	NM_001099404.2:c.3577C>T	p.R1193W	rs192379242	Uncertain_significance	0.009	0.632	D	1	0.899	D	0.964	0.693	D	6.906	0.932	33	0.000399	0.001	8.02e-05	6.78e-05	3.49e-05	0	0.0001	8.16e-05	7.7e-05	.	PM1PP3	VUS
chr3	38575424	38575424	G	A	SCN5A	NM_001099404.2:c.3539C>T	p.A1180V	rs41310765	Conflicting_interpretations_of_pathogenicity	0.062	0.586	T	0.001	0.154	B	0.005	0.179	B	2.289	0.336	18.09	0.0002	.	0.0001	3.48e-05	7.68e-05	0	0.0001	0	.	.	PM1PM2BP4	VUS
chr3	38576713	38576713	C	G	SCN5A	NM_001099404.2:c.3459G>C	p.Q1153H	rs776705132	Uncertain_significance	0.027	0.486	D	0.99	0.615	D	0.926	0.644	D	2.711	0.387	20.9	.	.	5.52e-05	0.0005	4.19e-05	0.0016	5.46e-05	0.0004	.	0.000504	PM1PP3	VUS
chr3	38581091	38581091	C	T	SCN5A	NM_001099404.2:c.3068G>A	p.R1023H	rs199473592	Conflicting_interpretations_of_pathogenicity	0.505	0.111	T	0.002	0.163	B	0.002	0.127	B	3.12	0.435	22.6	0.0002	.	0.0003	0.0019	0.0001	0.0026	0.0004	0.0022	.	0.001007	PM1BP4	VUS
chr3	38581149	38581149	A	G	SCN5A	NM_001099404.2:c.3010T>C	p.C1004R	rs199473183	Conflicting_interpretations_of_pathogenicity	0.039	0.427	D	0.986	0.764	D	0.859	0.875	P	3.521	0.481	23.1	0.000599	0.0031	0.0003	0.0023	2.79e-05	0.0013	0.0003	0.0022	.	.	PM1PP3	VUS
chr3	38581266	38581266	G	A	SCN5A	NM_001099404.2:c.2893C>T	p.R965C	rs199473180	Conflicting_interpretations_of_pathogenicity	0	0.912	D	1	0.899	D	0.989	0.916	D	6.872	0.93	33	0.0002	.	6.57e-05	0.0001	6.98e-06	0	6.5e-05	6.66e-05	.	.	PM1PM2PP3	VUS
chr3	38581356	38581356	G	T	SCN5A	NM_001099404.2:c.2803C>A	p.L935M	.	NA	0.001	0.784	D	1	0.899	D	0.999	0.916	D	5.419	0.735	26	.	.	.	.	.	.	.	.	.	.	PM1PM2PP3	VUS
chr3	38585708	38585708	C	T	SCN5A	NM_001099404.2:c.2770G>A	p.V924I	rs199473177	Conflicting_interpretations_of_pathogenicity	0.001	0.784	D	0.186	0.328	B	0.08	0.322	B	5.323	0.72	25.8	.	.	0.0001	0.0009	5.52e-05	0.0021	0.0001	0.001	.	.	PM1PP3	VUS
chr3	38585753	38585753	C	T	SCN5A	NM_001099404.2:c.2725G>A	p.V909M	.	NA	0	0.912	D	0.984	0.899	D	0.919	0.916	D	6.39	0.882	29.6	.	.	.	.	.	.	.	.	.	.	PM1PM2PP3	VUS
chr3	38585864	38585864	C	T	SCN5A	NM_001099404.2:c.2614G>A	p.D872N	rs763396298	Uncertain_significance	0.488	0.09	T	0.797	0.899	P	0.071	0.797	B	2.632	0.377	20.4	.	.	1.62e-05	0	6.98e-06	0	1.65e-05	0	.	.	PM1PM2BP4	VUS
chr3	38585981	38585981	C	T	SCN5A	NM_001099404.2:c.2497G>A	p.G833R	rs45475899	Conflicting_interpretations_of_pathogenicity	0	0.912	D	1	0.899	D	1	0.971	D	7.34	0.949	34	0.000399	.	0.0002	0.001	4.19e-05	0.0013	0.0002	0.0008	7.7e-05	.	PM1PP3	VUS
chr3	38597817	38597817	A	G	SCN5A	NM_001099404.2:c.2174T>C	p.M725T	.	NA	0.001	0.912	D	0.004	0.165	B	0.004	0.212	B	3.483	0.476	23.1	.	.	.	.	.	.	.	.	.	.	PM1PM2PP3	VUS
chr3	38597925	38597925	C	T	SCN5A	NM_001099404.2:c.2066G>A	p.R689H	rs199473145	Uncertain_significance	0.148	0.405	T	0.001	0.139	B	0.001	0.093	B	2.92	0.411	21.9	0.0002	0.001	0.0001	0.0004	9.77e-05	0.0007	0.0001	0.0004	7.8e-05	.	BP4	VUS
chr3	38598927	38598927	C	T	SCN5A	NM_001099404.2:c.2014G>A	p.A672T	rs199473140	Conflicting_interpretations_of_pathogenicity	1	0.01	T	0.007	0.184	B	0.001	0.112	B	2.447	0.355	19.12	0.001797	0.0082	0.0008	0.0059	0.0002	0.0069	0.0009	0.0058	7.7e-05	0.001511	BP4	VUS
chr3	38604025	38604025	C	T	SCN5A	NM_001099404.2:c.1577G>A	p.R526H	rs45627438	Uncertain_significance	0.46	0.104	T	0	0.102	B	0.002	0.08	B	2.39	0.348	18.75	0.000399	0.001	6.26e-05	0.0002	2.79e-05	0	6.85e-05	0.0002	0.0002	.	PM1BP4	VUS
chr3	38604806	38604806	G	A	SCN5A	NM_001099404.2:c.1441C>T	p.R481W	rs144511230	Conflicting_interpretations_of_pathogenicity	0.001	0.912	D	0.009	0.764	B	0.005	0.646	B	6.396	0.883	29.6	0.002796	.	0.0009	0	0.0036	0	0.0011	0	0.0032	0.001511	PP3	VUS
chr3	38604875	38604875	G	A	SCN5A	NM_001099404.2:c.1372C>T	p.R458C	rs752130196	Conflicting_interpretations_of_pathogenicity	0.168	0.24	T	0.99	0.647	D	0.556	0.539	P	6.393	0.883	29.6	.	.	0.0001	0.0011	2.09e-05	0.001	0.0002	0.0014	.	0.001007	PP3PS3	VUS
chr3	38605953	38605953	C	T	SCN5A	NM_001099404.2:c.1336G>A	p.E446K	rs199473339	Conflicting_interpretations_of_pathogenicity	0.001	0.784	D	0.959	0.899	D	0.202	0.85	B	6.605	0.907	31	0.000599	0.0031	0.0006	0.0037	0.0001	0.0026	0.0007	0.005	8e-05	0.000504	PP3	VUS
chr3	38608194	38608194	C	T	SCN5A	NM_001099404.2:c.955G>A	p.G319S	rs199473090	Uncertain_significance	0.01	0.784	D	0.96	0.899	D	0.486	0.971	P	7.432	0.951	34	.	.	4.87e-05	0.0003	3.49e-05	0.0003	5.8e-05	0.0004	.	.	PM1PM2PP3	VUS
chr3	38620918	38620918	C	T	SCN5A	NM_001099404.2:c.536G>A	p.R179Q	rs760585484	Uncertain_significance	0.001	0.912	D	1	0.899	D	0.997	0.875	D	7.847	0.956	35	.	.	2.85e-05	9.78e-05	.	.	2.72e-05	0	.	.	PM1PM2PP3	VUS
chr3	38630330	38630330	C	G	SCN5A	NM_001099404.2:c.373G>C	p.V125L	rs199473059	Conflicting_interpretations_of_pathogenicity	0.003	0.784	D	0.264	0.383	B	0.03	0.361	B	6.449	0.89	29.8	0.000399	0.002	0.0002	0.0017	3.49e-05	0.0016	0.0003	0.0019	.	.	PP3	VUS
chr3	38630335	38630335	G	A	SCN5A	NM_001099404.2:c.368C>T	p.A123V	rs765699394	Uncertain_significance	0.172	0.309	T	0	0.119	B	0.001	0.121	B	2.421	0.352	18.96	.	.	7.72e-05	0.0003	9.77e-05	0.0007	4.14e-05	0.0003	.	.	BP4	VUS
chr3	38630344	38630344	A	G	SCN5A	NM_001099404.2:c.359T>C	p.I120T	rs794728844	Uncertain_significance	0.033	0.784	D	0.03	0.32	B	0.014	0.42	B	4.29	0.574	24	.	.	.	.	.	.	.	.	.	.	PM2PP3	VUS
chr3	38630420	38630420	C	T	SCN5A	NM_001099404.2:c.283G>A	p.V95I	rs199473054	Conflicting_interpretations_of_pathogenicity	0.016	0.784	D	0.999	0.764	D	0.979	0.782	D	6.999	0.937	33	0.0002	.	3.25e-05	9.75e-05	1.4e-05	0	3.31e-05	0.0002	.	.	PM2PP3BS3	VUS
chr3	38633187	38633187	C	G	SCN5A	NM_001099404.2:c.121G>C	p.E41Q	.	NA	0.542	0.09	T	0.596	0.476	P	0.147	0.482	B	3.581	0.488	23.2	.	.	.	.	.	.	.	.	.	.	PM2BP4	VUS
chr3	38633256	38633256	G	A	SCN5A	NM_001099404.2:c.52C>T	p.R18W	rs199473044	Conflicting_interpretations_of_pathogenicity	0.007	0.682	D	0.993	0.899	D	0.727	0.699	P	7.377	0.95	34	0.0002	0.001	0.0003	0.0017	9.07e-05	0.0016	0.0003	0.0019	.	0.001007	PP3	VUS
chr3	38633267	38633267	C	A	SCN5A	NM_001099404.2:c.41G>T	p.R14L	.	NA	0.004	0.654	D	0.649	0.715	P	0.103	0.807	B	6.907	0.932	33	.	.	.	.	.	.	.	.	.	.	PM2PP3	VUS
chr3	38633288	38633288	G	A	SCN5A	NM_001099404.2:c.20C>T	p.P7L	.	NA	0.001	0.912	D	0.89	0.544	P	0.381	0.503	B	5.458	0.741	26.1	.	.	4.1e-06	3.25e-05	.	.	.	.	.	.	PM2PP3	VUS
chr3	38697741	38697741	C	T	SCN10A	NM_006514.4:c.5479G>A	p.E1827K	rs757155232	Uncertain_significance	0.001	0.784	D	0.993	0.637	D	0.899	0.62	P	6.871	0.93	33	.	.	0.0001	0.0008	6.98e-06	0.0003	0.0001	0.0008	.	.	PP3	VUS
chr3	38697773	38697773	C	T	SCN10A	NM_006514.4:c.5447G>A	p.G1816E	.	NA	0.072	0.349	T	1	0.899	D	1	0.971	D	4.531	0.607	24.3	.	.	.	.	.	.	.	.	.	.	PM2PP3	VUS
chr3	38697774	38697774	C	T	SCN10A	NM_006514.4:c.5446G>A	p.G1816R	rs779692735	NA	0.001	0.784	D	1	0.899	D	1	0.971	D	6.462	0.891	29.9	.	.	0.0002	9.75e-05	1.4e-05	0	0.0001	0.0002	.	.	PM2PP3	VUS
chr3	38697899	38697899	G	A	SCN10A	NM_006514.4:c.5321C>T	p.P1774L	rs771302766	NA	0	0.912	D	1	0.899	D	1	0.971	D	6.055	0.834	28.1	.	.	1.22e-05	9.75e-05	.	.	8.24e-06	6.06e-05	.	.	PM2PP3	VUS
chr3	38698197	38698197	G	T	SCN10A	NM_006514.4:c.5023C>A	p.P1675T	rs758877832	NA	0.001	0.784	D	0.993	0.637	D	0.932	0.65	D	4.128	0.554	23.8	.	.	2.03e-05	0.0002	6.98e-06	0.0003	8.24e-06	6.06e-05	.	.	PM1PM2PP3	VUS
chr3	38698278	38698278	C	T	SCN10A	NM_006514.4:c.4942G>A	p.A1648T	rs529861077	NA	0.036	0.433	D	0.999	0.764	D	0.857	0.593	P	5.193	0.701	25.5	0.0002	0.001	2.44e-05	9.75e-05	2.1e-05	0.0007	3.3e-05	0.0002	.	.	PM1PP3	VUS
chr3	38698347	38698347	C	T	SCN10A	NM_006514.4:c.4873G>A	p.G1625S	rs776389291	NA	0	0.912	D	1	0.899	D	1	0.971	D	6.917	0.933	33	.	.	1.22e-05	6.5e-05	1.4e-05	0	1.65e-05	6.06e-05	.	.	PM1PM2PP3	VUS
chr3	38698484	38698484	C	T	SCN10A	NM_006514.4:c.4736G>A	p.R1579Q	rs781118074	Uncertain_significance	0	0.912	D	1	0.899	D	0.968	0.701	D	6.941	0.934	33	.	.	8.54e-05	0.0003	6.28e-05	0.0013	8.24e-05	0.0004	.	0.000504	PM1PP3	VUS
chr3	38698511	38698511	G	A	SCN10A	NM_006514.4:c.4709C>T	p.T1570M	rs772484960	Uncertain_significance	0	0.912	D	1	0.899	D	0.99	0.774	D	4.976	0.669	25.1	.	.	3.66e-05	3.25e-05	4.19e-05	0	3.3e-05	6.06e-05	.	.	PM1PM2PP3	VUS
chr3	38707289	38707289	G	A	SCN10A	NM_006514.4:c.4376C>T	p.P1459L	rs757704367	NA	0.012	0.546	D	1	0.899	D	0.998	0.875	D	6.523	0.898	31	.	.	5.69e-05	0.0004	1.4e-05	0	6.6e-05	0.0004	.	.	PM2PP3	VUS
chr3	38714004	38714004	C	T	SCN10A	NM_006514.4:c.3758G>A	p.R1253H	rs770705124	NA	0	0.912	D	0.989	0.609	D	0.877	0.604	P	6.711	0.917	32	.	.	4.06e-06	0	1.4e-05	0	8.25e-06	0	.	.	PM1PM2PP3	VUS
chr3	38722262	38722262	G	A	SCN10A	NM_006514.4:c.3503C>T	p.S1168F	rs540928678	NA	0	0.912	D	0.832	0.442	P	0.248	0.372	B	4.46	0.597	24.2	0.0002	0.001	3.26e-05	0.0003	.	.	2.51e-05	0.0002	.	.	PM1PP3	VUS
chr3	38723442	38723442	A	G	SCN10A	NM_006514.4:c.3340T>C	p.C1114R	rs771127702	Uncertain_significance	0	0.912	D	1	0.899	D	0.999	0.916	D	5.985	0.823	27.8	.	.	7.39e-05	0.0006	.	.	9.07e-05	0.0007	.	.	PM1PP3	VUS
chr3	38726877	38726877	G	A	SCN10A	NM_006514.4:c.2816C>T	p.P939L	rs202174472	Conflicting_interpretations_of_pathogenicity	0.043	0.413	D	0.237	0.291	B	0.122	0.308	B	0.635	0.155	8.397	.	.	0.0003	0.0003	0.0001	0.001	0.0002	0.0001	.	0.001511	PM1BP4	VUS
chr3	38726946	38726946	C	G	SCN10A	NM_006514.4:c.2747G>C	p.R916P	rs267599804	NA	0	0.912	D	1	0.899	D	1	0.971	D	7.603	0.953	34	.	.	8.13e-06	6.5e-05	.	.	1.65e-05	0.0001	.	.	PM1PM2PP3	VUS
chr3	38728815	38728815	G	T	SCN10A	NM_006514.4:c.2367C>A	p.N789K	rs770046573	Uncertain_significance	0.005	0.632	D	0.992	0.629	D	0.811	0.568	P	5.652	0.77	26.7	.	.	2.46e-05	6.5e-05	9.77e-05	0	6.59e-05	0.0001	.	.	PM1PM2PP3	VUS
chr3	38728895	38728895	C	T	SCN10A	NM_006514.4:c.2287G>A	p.V763I	rs569904203	NA	0	0.912	D	0.989	0.609	D	0.803	0.565	P	5.36	0.726	25.9	0.0002	0.001	0.0003	0.0021	6.29e-05	0.0023	0.0004	0.0031	.	0.000508	PM1PP3	VUS
chr3	38728897	38728897	C	T	SCN10A	NM_006514.4:c.2285G>A	p.R762H	rs778131235	Uncertain_significance	0	0.912	D	1	0.899	D	0.999	0.916	D	7.294	0.948	34	.	.	1.25e-05	3.32e-05	4.19e-05	0	8.51e-06	0	.	.	PM1PM2PP3	VUS
chr3	38750124	38750124	G	A	SCN10A	NM_006514.4:c.1816C>T	p.R606W	rs763821142	NA	0.017	0.512	D	1	0.899	D	0.957	0.682	D	5.668	0.773	26.7	.	.	4.08e-06	0	6.98e-06	0	0	0	.	.	PM2PP3	VUS
chr3	38752452	38752452	G	A	SCN10A	NM_006514.4:c.1522C>T	p.R508W	rs112774699	Uncertain_significance	0.005	0.632	D	0.993	0.637	D	0.507	0.46	P	5.746	0.785	26.9	.	.	3.69e-05	0.0002	2.79e-05	0.0007	5.02e-05	0.0003	.	.	PP3	VUS
chr3	38752484	38752484	C	T	SCN10A	NM_006514.4:c.1490G>A	p.R497H	rs766682646	NA	0.008	0.586	D	1	0.899	D	0.991	0.782	D	5.519	0.75	26.3	.	.	1.71e-05	0	1.4e-05	0	1.73e-05	0	.	.	PM2PP3	VUS
chr3	38756723	38756723	T	C	SCN10A	NM_006514.4:c.1241A>G	p.K414R	rs780326732	NA	0.024	0.477	D	0.998	0.715	D	0.99	0.774	D	4.815	0.646	24.8	.	.	8.13e-06	6.5e-05	6.98e-06	0	8.24e-06	6.06e-05	.	.	PM2PP3	VUS
chr3	38761261	38761261	G	C	SCN10A	NM_006514.4:c.814C>G	p.L272V	.	NA	0	0.912	D	0.999	0.764	D	0.999	0.916	D	5.268	0.712	25.7	.	.	.	.	.	.	.	.	.	.	PM1PM2PP3	VUS
chr3	38761383	38761383	C	T	SCN10A	NM_006514.4:c.692G>A	p.G231D	rs764095900	Uncertain_significance	0.001	0.784	D	1	0.899	D	1	0.971	D	6.125	0.844	28.3	.	.	7.79e-05	0.0006	1.4e-05	0.0007	6.81e-05	0.0005	.	.	PM1PP3	VUS
chr3	38771375	38771375	G	T	SCN10A	NM_006514.4:c.503C>A	p.A168D	rs558639346	Uncertain_significance	0.001	0.784	D	0.975	0.561	D	0.776	0.553	P	6.265	0.865	29	0.000399	0.002	6.9e-05	0.0005	4.89e-05	0.0013	9.89e-05	0.0006	.	.	PM1PP3	VUS
chr3	38789003	38789003	C	A	SCN10A	NM_006514.4:c.423G>T	p.L141F	.	NA	0.02	0.496	D	0.002	0.09	B	0.002	0.063	B	3.429	0.47	23	.	.	.	.	.	.	.	.	.	.	PM1PM2PP3	VUS
chr3	38789020	38789020	T	C	SCN10A	NM_006514.4:c.406A>G	p.I136V	rs372138097	NA	0	0.912	D	0.7	0.399	P	0.168	0.335	B	5.303	0.717	25.8	.	.	0.0003	0.0024	4.19e-05	0.0013	0.0003	0.002	7.7e-05	0.001511	PM1PP3	VUS
chr3	38792132	38792132	G	A	SCN10A	NM_006514.4:c.307C>T	p.R103W	rs750073618	Uncertain_significance	0	0.912	D	1	0.899	D	0.999	0.916	D	7.104	0.942	34	.	.	4.07e-06	0	2.1e-05	0	8.25e-06	0	.	.	PM2PP3	VUS
chr3	38793977	38793977	T	C	SCN10A	NM_006514.4:c.34A>G	p.N12D	.	NA	0.012	0.546	D	0.89	0.47	P	0.318	0.399	B	2.623	0.376	20.3	.	.	4.07e-06	0	.	.	.	.	.	.	PM2PP3	VUS
chr3	57757682	57757682	C	T	SLMAP	NM_001304420.3:c.31C>T	p.R11C	rs767298958	NA	0.091	0.327	T	0.971	0.552	D	0.579	0.483	P	4.569	0.612	24.4	.	.	7.31e-05	0.0006	6.98e-06	0.0003	6.62e-05	0.0005	.	.	PP3	VUS
chr3	57862027	57862027	T	G	SLMAP	NM_001304420.3:c.907T>G	p.L303V	rs767536802	NA	0.073	0.912	T	0.042	0.41	B	0.071	0.402	B	3.525	0.481	23.1	.	.	2.03e-05	0.0002	.	.	2.48e-05	0.0002	.	.	PM2BP4	VUS
chr3	57907931	57907931	C	G	SLMAP	NM_001304420.3:c.1498C>G	p.Q500E	.	NA	0.019	0.599	D	0.259	0.297	B	0.137	0.328	B	0.754	0.166	9.179	.	.	.	.	.	.	.	.	.	.	PM2BP4	VUS
chr3	57907955	57907955	G	A	SLMAP	NM_001304420.3:c.1522G>A	p.E508K	rs528459774	NA	0.002	0.912	D	1	0.899	D	0.997	0.85	D	6.87	0.93	33	.	.	8.14e-06	0	6.98e-06	0	.	.	.	.	PM2PP3	VUS
chr3	57907958	57907958	G	T	SLMAP	NM_001304420.3:c.1525G>T	p.A509S	.	NA	0.013	0.912	D	1	0.899	D	0.998	0.916	D	6.173	0.852	28.6	.	.	.	.	.	.	.	.	.	.	PM2PP3	VUS
chr3	57916985	57916985	G	C	SLMAP	NM_001304420.3:c.2167G>C	p.G723R	rs1031064499	NA	0.007	0.682	D	1	0.899	D	1	0.971	D	4.778	0.641	24.7	.	.	.	.	.	.	.	.	.	.	PM2PP3	VUS
chr4	113049756	113049756	A	G	ANK2	NM_001148.6:c.28A>G	p.S10G	.	NA	0.036	0.518	D	0.888	0.5	P	0.453	0.508	P	4.423	0.592	24.2	.	.	.	.	6.98e-06	0	.	.	.	.	PM2PP3	VUS
chr4	113174446	113174446	G	T	ANK2	NM_001148.6:c.115G>T	p.A39S	.	Uncertain_significance	0	0.912	D	1	0.899	D	0.997	0.916	D	6.435	0.888	29.8	.	.	4.07e-06	0	.	.	.	.	.	.	PM2PP3	VUS
chr4	113196411	113196411	T	C	ANK2	NM_001148.6:c.230T>C	p.V77A	.	NA	0.141	0.477	T	0.985	0.592	D	0.926	0.644	D	4.633	0.621	24.5	.	.	.	.	.	.	.	.	.	.	PM2PP3	VUS
chr4	113240537	113240537	C	A	ANK2	NM_001148.6:c.746C>A	p.A249E	.	NA	0.001	0.912	D	1	0.899	D	0.997	0.85	D	7.349	0.949	34	.	.	.	.	.	.	.	.	.	.	PM1PM2PP3	VUS
chr4	113242195	113242195	G	A	ANK2	NM_001148.6:c.877G>A	p.D293N	rs752213208	Uncertain_significance	0.203	0.316	T	1	0.899	D	1	0.971	D	7.151	0.944	34	.	.	0.0001	0.0002	9.77e-05	0.0003	0.0001	0.0004	.	.	PM1PM2PP3	VUS
chr4	113277877	113277877	G	C	ANK2	NM_001148.6:c.1724G>C	p.S575T	.	NA	0.058	0.461	T	0.974	0.564	D	0.893	0.616	P	4.769	0.64	24.7	.	.	.	.	.	.	.	.	.	.	PM1PM2PP3	VUS
chr4	113278514	113278514	C	A	ANK2	NM_001148.6:c.1837C>A	p.L613M	rs780091077	Uncertain_significance	0.163	0.491	T	0.998	0.764	D	0.984	0.875	D	6.594	0.906	31	.	.	2.84e-05	0.0002	.	.	5.77e-05	0.0004	.	.	PM1PM2PP3	VUS
chr4	113288422	113288422	A	G	ANK2	NM_001148.6:c.2213A>G	p.Y738C	.	NA	0.003	0.784	D	1	0.899	D	1	0.971	D	6.043	0.832	28	.	.	.	.	.	.	.	.	.	.	PM1PM2PP3	VUS
chr4	113288446	113288446	T	G	ANK2	NM_001148.6:c.2237T>G	p.F746C	rs760469731	NA	0.001	0.784	D	1	0.899	D	1	0.971	D	6.313	0.872	29.2	.	.	4.06e-06	0	.	.	8.24e-06	0	.	.	PM1PM2PP3	VUS
chr4	113293471	113293471	G	A	ANK2	NM_001148.6:c.2408G>A	p.R803H	.	NA	0.051	0.564	T	1	0.899	D	0.996	0.916	D	7.418	0.951	34	.	.	.	.	.	.	.	.	.	.	PM2PP3	VUS
chr4	113318589	113318589	G	A	ANK2	NM_001148.6:c.2869G>A	p.V957M	rs756861229	Uncertain_significance	0.122	0.446	T	1	0.899	D	0.942	0.832	D	6.344	0.876	29.3	.	.	4.49e-05	0.0001	2.79e-05	0.0003	3.7e-05	0.0001	.	.	PM2PP3	VUS
chr4	113323770	113323770	C	A	ANK2	NM_001127493.3:c.2849C>A	p.P950Q	rs564921294	NA	0.058	0.377	T	1	0.899	D	0.998	0.875	D	3.082	0.43	22.5	0.0002	0.001	0.0001	0.001	4.89e-05	0.0023	0.0001	0.0009	.	.	PP3	VUS
chr4	113330296	113330296	G	A	ANK2	NM_001148.6:c.2951G>A	p.C984Y	.	NA	0.137	0.477	T	0.998	0.899	D	0.974	0.916	D	6.225	0.859	28.8	.	.	4.06e-06	3.25e-05	.	.	.	.	.	.	PM1PM2PP3	VUS
chr4	113333199	113333199	A	G	ANK2	NM_001148.6:c.3370A>G	p.M1124V	rs772670683	NA	0.012	0.721	D	0.587	0.51	P	0.093	0.534	B	1.942	0.294	15.85	.	.	8.12e-06	6.5e-05	.	.	8.24e-06	6.06e-05	.	.	PM2PP3	VUS
chr4	113335864	113335864	A	T	ANK2	NM_001148.6:c.3398A>T	p.D1133V	.	NA	0.001	0.784	D	0.973	0.67	D	0.644	0.631	P	6.025	0.829	27.9	.	.	.	.	.	.	.	.	.	.	PM2PP3	VUS
chr4	113335904	113335904	C	G	ANK2	NM_001148.6:c.3438C>G	p.D1146E	rs760867782	NA	0.015	0.599	D	0.998	0.899	D	0.986	0.971	D	6.301	0.87	29.1	.	.	2.03e-05	0	6.98e-06	0	3.3e-05	0	.	.	PM2PP3	VUS
chr4	113336686	113336686	C	G	ANK2	NM_001148.6:c.3701C>G	p.T1234S	rs777976430	NA	0.053	0.599	T	0.998	0.899	D	0.99	0.916	D	6.134	0.846	28.4	.	.	8.12e-06	3.25e-05	2.09e-05	0	1.65e-05	6.06e-05	.	.	PM2PP3	VUS
chr4	113339286	113339286	A	G	ANK2	NM_001148.6:c.3857A>G	p.N1286S	.	NA	0.109	0.486	T	0.967	0.764	D	0.604	0.725	P	4.916	0.661	25	.	.	.	.	.	.	.	.	.	.	PM2PP3	VUS
chr4	113343128	113343128	C	A	ANK2	NM_001148.6:c.4234C>A	p.P1412T	.	NA	0.156	0.424	T	0.495	0.556	P	0.084	0.651	B	6.254	0.863	28.9	.	.	.	.	.	.	.	.	.	.	PM1PM2BP4	VUS
chr4	113353284	113353284	A	G	ANK2	NM_001148.6:c.4666A>G	p.K1556E	.	NA	0.003	0.784	D	0.998	0.764	D	0.99	0.85	D	5.168	0.697	25.5	.	.	.	.	.	.	.	.	.	.	PM2PP3	VUS
chr4	113353725	113353725	C	T	ANK2	NM_001148.6:c.5107C>T	p.P1703S	rs747867539	NA	0.008	0.721	D	0.978	0.568	D	0.531	0.468	P	5.227	0.706	25.6	.	.	0	0	.	.	8.34e-06	6.08e-05	.	.	PM2PP3	VUS
chr4	113354049	113354049	C	A	ANK2	NM_001148.6:c.5431C>A	p.P1811T	rs200645469	Uncertain_significance	0.002	0.721	D	0.483	0.349	P	0.122	0.308	B	1.079	0.198	11.1	.	.	8.15e-06	3.25e-05	6.98e-06	0.0003	8.25e-06	6.06e-05	.	.	PM2BP4	VUS
chr4	113354362	113354362	C	T	ANK2	NM_001148.6:c.5744C>T	p.P1915L	.	NA	0.001	0.784	D	0.799	0.566	P	0.212	0.558	B	5.987	0.823	27.8	.	.	.	.	6.98e-06	0	.	.	.	.	PM2PP3	VUS
chr4	113354970	113354970	G	A	ANK2	NM_001148.6:c.6352G>A	p.E2118K	rs777615903	NA	0.005	0.632	D	0.009	0.494	B	0.005	0.44	B	2.934	0.413	22	.	.	4.48e-05	0.0004	1.4e-05	0.0003	2.48e-05	0.0002	.	.	PM2PP3	VUS
chr4	113355463	113355463	C	A	ANK2	NM_001148.6:c.6845C>A	p.T2282N	.	NA	0.027	0.465	D	0	0.102	B	0.001	0.08	B	-0.272	0.07	0.767	.	.	4.11e-06	3.25e-05	.	.	.	.	.	.	PM2BP4	VUS
chr4	113355873	113355873	G	A	ANK2	NM_001148.6:c.7255G>A	p.E2419K	rs752704424	Uncertain_significance	0.001	0.784	D	0.997	0.899	D	0.746	0.807	P	5.72	0.781	26.9	.	.	8.15e-06	0	.	.	8.25e-06	0	.	.	PM2PP3	VUS
chr4	113356008	113356008	C	T	ANK2	NM_001148.6:c.7390C>T	p.P2464S	.	NA	0.002	0.721	D	1	0.899	D	0.999	0.916	D	6.106	0.841	28.3	.	.	.	.	.	.	.	.	.	.	PM2PP3	VUS
chr4	113356045	113356045	C	G	ANK2	NM_001148.6:c.7427C>G	p.P2476R	.	NA	0.131	0.266	T	0.112	0.533	B	0.08	0.486	B	2.581	0.371	19.99	.	.	.	.	.	.	.	.	.	.	PM2BP4	VUS
chr4	113356054	113356054	A	G	ANK2	NM_001148.6:c.7436A>G	p.K2479R	rs201619005	Conflicting_interpretations_of_pathogenicity	0.021	0.491	D	0.18	0.512	B	0.044	0.481	B	5.167	0.697	25.5	.	.	0.0001	0.001	.	.	0.0001	0.001	.	0.000504	PP3	VUS
chr4	113356117	113356117	C	T	ANK2	NM_001148.6:c.7499C>T	p.T2500M	rs200377748	Uncertain_significance	0.171	0.227	T	0.968	0.546	D	0.549	0.474	P	-0.085	0.086	1.848	0.0002	.	5.3e-05	6.5e-05	4.19e-05	0	4.95e-05	6.06e-05	.	.	PM2BP4	VUS
chr4	113356321	113356321	G	T	ANK2	NM_001148.6:c.7703G>T	p.C2568F	rs767713191	NA	0.006	0.614	D	0.855	0.574	P	0.271	0.541	B	4.238	0.568	23.9	.	.	4.07e-06	3.25e-05	.	.	8.24e-06	6.06e-05	.	.	PM2PP3	VUS
chr4	113356386	113356386	A	G	ANK2	NM_001148.6:c.7768A>G	p.K2590E	.	NA	0.029	0.457	D	1	0.899	D	0.994	0.807	D	4.737	0.635	24.6	.	.	.	.	.	.	.	.	.	.	PM2PP3	VUS
chr4	113356589	113356589	C	G	ANK2	NM_001148.6:c.7971C>G	p.S2657R	rs146085234	NA	0.028	0.461	D	0.437	0.453	B	0.157	0.431	B	4.026	0.541	23.6	0.000399	0.002	7.74e-05	0.0006	2.09e-05	0.001	7.43e-05	0.0005	.	.	PP3	VUS
chr4	113357137	113357137	C	T	ANK2	NM_001148.6:c.8519C>T	p.P2840L	.	NA	0.155	0.241	T	0.002	0.102	B	0.004	0.093	B	2.979	0.418	22.2	.	.	.	.	6.98e-06	0.0003	.	.	.	.	PM2BP4	VUS
chr4	113357343	113357343	C	A	ANK2	NM_001148.6:c.8725C>A	p.P2909T	.	NA	0.035	0.437	D	0.799	0.566	P	0.261	0.528	B	1.287	0.219	12.2	.	.	.	.	.	.	.	.	.	.	PM2BP4	VUS
chr4	113357583	113357583	G	C	ANK2	NM_001148.6:c.8965G>C	p.E2989Q	rs772344557	NA	0.006	0.614	D	0.978	0.568	D	0.666	0.512	P	1.146	0.204	11.46	.	.	7.33e-05	0.0006	.	.	0.0001	0.0008	.	.	PP3	VUS
chr4	113358135	113358135	G	C	ANK2	NM_001148.6:c.9517G>C	p.E3173Q	.	NA	0.007	0.599	D	0.799	0.535	P	0.323	0.544	B	1.821	0.28	15.11	.	.	.	.	.	.	.	.	.	.	PM2PP3	VUS
chr4	113358354	113358354	G	T	ANK2	NM_001148.6:c.9736G>T	p.D3246Y	rs371808294	NA	0.02	0.496	D	0.468	0.581	P	0.096	0.527	B	2.907	0.41	21.9	.	.	.	.	.	.	.	.	.	.	PM2PP3	VUS
chr4	113358535	113358535	T	C	ANK2	NM_001148.6:c.9917T>C	p.V3306A	.	NA	0.002	0.721	D	0.001	0.226	B	0.001	0.272	B	0.874	0.177	9.913	.	.	.	.	.	.	.	.	.	.	PM2BP4	VUS
chr4	113358547	113358547	C	T	ANK2	NM_001148.6:c.9929C>T	p.P3310L	.	NA	0.001	0.784	D	0.006	0.46	B	0.005	0.418	B	5.675	0.774	26.7	.	.	.	.	.	.	.	.	.	.	PM2PP3	VUS
chr4	113358576	113358576	G	C	ANK2	NM_001148.6:c.9958G>C	p.E3320Q	.	NA	0.034	0.44	D	0.999	0.899	D	0.994	0.85	D	0.998	0.189	10.65	.	.	.	.	.	.	.	.	.	.	PM2PP3	VUS
chr4	113358715	113358715	C	A	ANK2	NM_001148.6:c.10097C>A	p.T3366N	rs560594488	NA	0.002	0.721	D	0.047	0.229	B	0.024	0.244	B	-1.184	0.026	0.007	0.000399	0.002	2.44e-05	0.0002	.	.	1.65e-05	0.0001	.	.	BP4	VUS
chr4	113360843	113360843	C	T	ANK2	NM_001148.6:c.10702C>T	p.R3568W	rs72556376	Uncertain_significance	0.001	0.912	D	1	0.899	D	0.937	0.764	D	7.657	0.954	35	0.000399	.	0.0002	6.53e-05	0.0002	0.0003	0.0002	0	0.0002	0.000504	PM2PP3	VUS
chr4	113360859	113360859	T	G	ANK2	NM_001148.6:c.10718T>G	p.L3573R	.	NA	0.074	0.912	T	0.988	0.899	D	0.776	0.916	P	6.837	0.927	33	.	.	.	.	.	.	.	.	.	.	PM1PM2PP3	VUS
chr4	113365051	113365051	T	A	ANK2	NM_001148.6:c.10901T>A	p.V3634D	rs66785829	Conflicting_interpretations_of_pathogenicity	0.365	0.395	T	0.07	0.259	B	0.211	0.365	B	4.753	0.637	24.7	0.001997	.	0.0024	0.0007	0.002	0.001	0.0027	0.0008	0.0024	0.019134	BP4PM1	VUS
chr4	113367652	113367652	G	A	ANK2	NM_001148.6:c.11119G>A	p.D3707N	rs199549660	Conflicting_interpretations_of_pathogenicity	0.019	0.682	D	0.955	0.629	P	0.284	0.552	B	3.899	0.525	23.5	0.000399	0.001	0.0003	0.0017	0.0002	0.002	0.0003	0.0013	7.7e-05	0.001007	PP3	VUS
chr4	113369675	113369675	A	G	ANK2	NM_001148.6:c.11480A>G	p.Q3827R	.	Uncertain_significance	0.016	0.912	D	0.454	0.715	P	0.104	0.797	B	3.265	0.451	22.8	.	.	.	.	6.98e-06	0	.	.	.	.	PM2PP3	VUS
chr4	113369717	113369717	C	T	ANK2	NM_001148.6:c.11522C>T	p.P3841L	rs767769233	Uncertain_significance	0.021	0.912	D	0.014	0.764	B	0.004	0.628	B	5.111	0.689	25.3	.	.	8.55e-05	0.0005	6.98e-06	0	9.11e-05	0.0005	.	.	PP3	VUS
chr6	123221488	123221488	T	G	TRDN	NM_006073.4:c.2049A>C	p.K683N	.	NA	.	.	.	0.906	0.48	P	0.521	0.464	P	5.408	0.733	26	.	.	8.6e-06	6.92e-05	.	.	.	.	.	.	PM2PP3BP1	VUS
chr6	123267731	123267731	T	C	TRDN	NM_006073.4:c.1759A>G	p.R587G	rs1045837438	NA	0.004	0.654	D	0.039	0.197	B	0.025	0.193	B	2.736	0.39	21	.	.	.	.	.	.	.	.	.	.	PM2PP3BP1	VUS
chr6	123279074	123279074	C	T	TRDN	NM_006073.4:c.1519G>A	p.V507I	rs554508912	NA	0	0.912	D	0.009	0.139	B	0.021	0.181	B	4.277	0.573	24	0.0002	0.001	1.24e-05	6.62e-05	.	.	1.69e-05	0.0001	.	.	PP3BP1	VUS
chr6	123352541	123352541	T	C	TRDN	NM_006073.4:c.1367A>G	p.Q456R	rs200243235	Conflicting_interpretations_of_pathogenicity	0	0.912	D	0.993	0.764	D	0.777	0.633	P	4.138	0.555	23.8	0.000399	.	0.0012	0.0014	0.0013	0.0023	0.0012	0.0012	0.0024	.	PP3BP1	VUS
chr6	123497213	123497213	A	G	TRDN	NM_006073.4:c.833T>C	p.V278A	rs954714094	NA	0.113	0.287	T	0.003	0.102	B	0.007	0.121	B	2.456	0.356	19.18	.	.	5.67e-06	0	.	.	.	.	.	.	PM2BP1BP4	Likely Benign(II)
chr6	123571027	123571027	G	A	TRDN	NM_006073.4:c.128C>T	p.T43M	rs748832633	NA	0	0.912	D	1	0.899	D	0.998	0.971	D	4.69	0.629	24.6	.	.	4.06e-05	0.0002	1.4e-05	0	5.8e-05	0.0002	.	.	PM1PM2PP3BP1	VUS
chr6	123571090	123571090	C	T	TRDN	NM_006073.4:c.65G>A	p.G22E	.	NA	0.002	0.721	D	1	0.899	D	1	0.971	D	4.955	0.666	25	.	.	.	.	.	.	.	.	.	.	PM2PP3BP1	VUS
chr6	123571091	123571091	C	T	TRDN	NM_006073.4:c.64G>A	p.G22R	.	NA	0.002	0.721	D	1	0.899	D	1	0.971	D	5.41	0.733	26	.	.	4.06e-06	3.25e-05	.	.	.	.	.	.	PM2PP3BP1	VUS
chr7	81950449	81950449	A	C	CACNA2D1	NM_000722.4:c.3219T>G	p.I1073M	.	NA	0.021	0.491	D	0.624	0.381	P	0.22	0.393	B	-0.363	0.064	0.475	.	.	.	.	.	.	.	.	.	.	PM2BP4	VUS
chr7	81968909	81968909	T	A	CACNA2D1	NM_000722.4:c.2373A>T	p.Q791H	.	NA	0.039	0.424	D	0.069	0.223	B	0.03	0.205	B	2.501	0.362	19.47	.	.	.	.	.	.	.	.	.	.	PM2PP3	VUS
chr7	81974517	81974517	T	A	CACNA2D1	NM_000722.4:c.1991A>T	p.N664I	.	NA	0.037	0.43	D	0.996	0.67	D	0.969	0.703	D	6.389	0.882	29.6	.	.	.	.	.	.	.	.	.	.	PM2PP3	VUS
chr7	81982598	81982598	C	G	CACNA2D1	NM_000722.4:c.1924G>C	p.E642Q	rs775481386	Uncertain_significance	0.029	0.481	D	0.917	0.488	P	0.733	0.536	P	4.524	0.606	24.3	.	.	1.22e-05	3.25e-05	.	.	1.65e-05	6.06e-05	.	.	PM2PP3	VUS
chr7	82038160	82038160	T	G	CACNA2D1	NM_000722.4:c.955A>C	p.K319Q	.	NA	0.003	0.682	D	0.963	0.537	D	0.771	0.551	P	6.003	0.826	27.9	.	.	.	.	.	.	.	.	.	.	PM2PP3	VUS
chr7	82050586	82050586	C	A	CACNA2D1	NM_001302890.2:c.922G>T	p.A308S	rs924357597	NA	0	0.912	D	.	.	.	.	.	.	0.228	0.116	4.968	.	.	2.27e-05	0	1.4e-05	0	.	.	.	.	PM2BP4	VUS
chr7	82050604	82050604	G	A	CACNA2D1	NM_001302890.2:c.904C>T	p.P302S	rs756473506	NA	0	0.912	D	.	.	.	.	.	.	-0.038	0.09	2.237	.	.	3.79e-05	0.0002	.	.	0.0001	0.0003	.	.	PM2BP4	VUS
chr7	82136667	82136667	C	T	CACNA2D1	NM_000722.4:c.364G>A	p.V122I	.	NA	1	0.01	T	0.001	0.067	B	0.005	0.104	B	2.003	0.302	16.23	.	.	9.41e-06	7.5e-05	.	.	.	.	.	.	PM2BP4	VUS
chr7	82349573	82349573	C	G	CACNA2D1	NM_000722.4:c.172G>C	p.V58L	.	NA	0.125	0.273	T	0.053	0.211	B	0.059	0.252	B	2.856	0.404	21.6	.	.	4.06e-06	3.25e-05	.	.	.	.	.	.	PM2BP4	VUS
chr7	91941146	91941146	A	T	AKAP9	NM_005751.5:c.47A>T	p.K16M	.	NA	0.001	0.912	D	1	0.899	D	0.999	0.916	D	6.257	0.864	28.9	.	.	.	.	.	.	.	.	.	.	PM2PP3	VUS
chr7	91973724	91973724	G	A	AKAP9	NM_005751.5:c.62G>A	p.R21Q	rs760483571	NA	0	0.912	D	1	0.899	D	0.996	0.832	D	7.094	0.941	33	.	.	8.15e-06	0	7.01e-06	0	1.73e-05	0	.	.	PM2PP3	VUS
chr7	91973897	91973897	C	T	AKAP9	NM_005751.5:c.235C>T	p.P79S	rs768026366	Conflicting_interpretations_of_pathogenicity	0.105	0.337	T	0.746	0.899	P	0.324	0.875	B	2.97	0.417	22.1	.	.	8.54e-05	0.0007	4.2e-05	0.002	6.6e-05	0.0005	.	.	BP4	VUS
chr7	91973904	91973904	C	A	AKAP9	NM_005751.5:c.242C>A	p.S81Y	rs551204201	NA	0.043	0.632	D	0.096	0.3	B	0.067	0.296	B	1.25	0.215	12.01	0.000399	0.002	8.13e-06	6.5e-05	.	.	2.47e-05	0.0001	.	.	BP4	VUS
chr7	91973943	91973943	G	T	AKAP9	NM_005751.5:c.281G>T	p.S94I	rs571281120	Uncertain_significance	0.001	0.784	D	0.34	0.346	B	0.064	0.377	B	0.923	0.182	10.21	0.0002	0.001	8.13e-06	6.5e-05	.	.	1.65e-05	0.0001	.	.	BP4	VUS
chr7	91994646	91994646	A	G	AKAP9	NM_005751.5:c.602A>G	p.K201R	rs566026093	NA	0.005	0.912	D	0.997	0.899	D	0.989	0.769	D	5.623	0.766	26.6	0.000599	0.0031	6.11e-05	0.0005	.	.	9.44e-05	0.0007	.	0.000505	PP3	VUS
chr7	92000984	92000984	A	T	AKAP9	NM_005751.5:c.1067A>T	p.D356V	rs533277424	Uncertain_significance	0.001	0.784	D	0.328	0.637	B	0.124	0.552	B	2.901	0.409	21.9	0.0002	0.001	5.58e-05	0.0004	.	.	4.58e-05	0.0001	.	.	PP3	VUS
chr7	92001027	92001027	C	A	AKAP9	NM_005751.5:c.1110C>A	p.N370K	.	NA	0.007	0.599	D	0.874	0.461	P	0.443	0.44	B	1.197	0.21	11.73	.	.	.	.	.	.	.	.	.	.	PM2BP4	VUS
chr7	92001220	92001220	G	A	AKAP9	NM_005751.5:c.1303G>A	p.A435T	rs769214842	NA	0.002	0.721	D	1	0.899	D	0.996	0.875	D	5.657	0.771	26.7	.	.	4.08e-06	3.25e-05	6.98e-06	0.0003	8.31e-06	6.08e-05	.	.	PM2PP3	VUS
chr7	92001421	92001421	T	G	AKAP9	NM_005751.5:c.1504T>G	p.L502V	.	NA	0.005	0.632	D	0.997	0.899	D	0.991	0.875	D	3.396	0.466	23	.	.	.	.	.	.	.	.	.	.	PM2PP3	VUS
chr7	92001528	92001528	G	T	AKAP9	NM_005751.5:c.1611G>T	p.L537F	rs527397436	NA	0.004	0.654	D	0.997	0.899	D	0.879	0.916	P	3.888	0.524	23.5	0.000399	0.002	6.1e-05	0.0005	6.98e-06	0.0003	8.29e-05	0.0006	.	.	PP3	VUS
chr7	92001967	92001967	G	C	AKAP9	NM_005751.5:c.2050G>C	p.E684Q	.	NA	0.002	0.721	D	0.999	0.899	D	0.994	0.875	D	4.763	0.639	24.7	.	.	.	.	.	.	.	.	.	.	PM2PP3	VUS
chr7	92002771	92002771	A	G	AKAP9	NM_005751.5:c.2854A>G	p.K952E	.	NA	0	0.912	D	0.999	0.764	D	0.968	0.754	D	4.131	0.554	23.8	.	.	.	.	.	.	.	.	.	.	PM2PP3	VUS
chr7	92002862	92002862	C	A	AKAP9	NM_005751.5:c.2945C>A	p.S982Y	rs374340343	Conflicting_interpretations_of_pathogenicity	0	0.912	D	0.996	0.899	D	0.804	0.916	P	6.544	0.901	31	0.001198	0.0061	0.0004	0.0033	9.78e-05	0.0046	0.0005	0.0036	.	.	PP3	VUS
chr7	92003230	92003230	G	A	AKAP9	NM_005751.5:c.3313G>A	p.E1105K	.	NA	0.115	0.285	T	0.049	0.764	B	0.039	0.686	B	6.907	0.932	33	.	.	.	.	.	.	.	.	.	.	PM2BP4	VUS
chr7	92012505	92012505	G	A	AKAP9	NM_005751.5:c.3395G>A	p.R1132H	rs776199737	NA	0.002	0.721	D	0.987	0.899	D	0.649	0.628	P	6.856	0.929	33	.	.	4.87e-05	0.0003	3.49e-05	0.0007	5.77e-05	0.0002	.	.	PP3	VUS
chr7	92012540	92012540	T	C	AKAP9	NM_005751.5:c.3430T>C	p.C1144R	rs141039834	Conflicting_interpretations_of_pathogenicity	0.002	0.721	D	0.987	0.637	D	0.648	0.567	P	2.654	0.38	20.5	0.001398	.	0.0004	0.0004	0.0004	0.001	0.0004	6.06e-05	0.0005	.	PP3	VUS
chr7	92014279	92014279	T	C	AKAP9	NM_005751.5:c.3563T>C	p.I1188T	rs147986403	NA	0.001	0.784	D	0.361	0.351	B	0.036	0.281	B	2.729	0.389	21	0.0002	0.001	3.66e-05	3.25e-05	5.58e-05	0	2.57e-05	6.38e-05	7.7e-05	.	PP3	VUS
chr7	92022886	92022886	A	G	AKAP9	NM_005751.5:c.4025A>G	p.E1342G	.	NA	0.111	0.29	T	0.001	0.119	B	0.003	0.139	B	3.341	0.46	22.9	.	.	.	.	.	.	.	.	.	.	PM2BP4	VUS
chr7	92038617	92038617	G	A	AKAP9	NM_005751.5:c.4537G>A	p.E1513K	.	NA	0.003	0.682	D	0.996	0.715	D	0.874	0.782	P	6.537	0.9	31	.	.	.	.	.	.	.	.	.	.	PM2PP3	VUS
chr7	92040821	92040821	C	T	AKAP9	NM_005751.5:c.4840C>T	p.R1614W	rs772669837	Uncertain_significance	0.001	0.784	D	1	0.899	D	0.895	0.699	P	6.517	0.898	31	.	.	3.66e-05	0.0001	4.2e-05	0	5.8e-05	0.0002	.	0.001007	PM2PP3	VUS
chr7	92045067	92045067	C	A	AKAP9	NM_005751.5:c.5222C>A	p.T1741K	.	NA	0.001	0.784	D	0.999	0.899	D	0.991	0.85	D	6.917	0.933	33	.	.	.	.	.	.	.	.	.	.	PM2PP3	VUS
chr7	92045117	92045117	G	C	AKAP9	NM_005751.5:c.5272G>C	p.D1758H	rs142603711	Uncertain_significance	0.001	0.784	D	1	0.899	D	0.997	0.916	D	6.302	0.87	29.1	.	.	3.66e-05	0.0003	7e-06	0.0003	4.94e-05	0.0003	7.7e-05	.	PM2PP3	VUS
chr7	92052756	92052756	G	C	AKAP9	NM_005751.5:c.5399G>C	p.G1800A	.	NA	0.05	0.395	D	0.041	0.223	B	0.028	0.256	B	1.204	0.21	11.77	.	.	.	.	.	.	.	.	.	.	PM2BP4	VUS
chr7	92062399	92062399	G	A	AKAP9	NM_005751.5:c.5890G>A	p.A1964T	rs778292318	NA	0.21	0.196	T	0.958	0.561	D	0.528	0.504	P	4.07	0.546	23.7	.	.	1.63e-05	0.0001	.	.	1.66e-05	0.0001	.	.	PM2PP3	VUS
chr7	92065318	92065318	A	G	AKAP9	NM_005751.5:c.6065A>G	p.Q2022R	.	Uncertain_significance	0.11	0.291	T	0.999	0.899	D	0.994	0.85	D	5.464	0.741	26.1	.	.	4.07e-06	0	1.4e-05	0	.	.	.	.	PM2PP3	VUS
chr7	92066525	92066525	C	G	AKAP9	NM_005751.5:c.6309C>G	p.I2103M	.	NA	0.068	0.357	T	0.468	0.375	P	0.154	0.454	B	3.487	0.477	23.1	.	.	.	.	1.4e-05	0	.	.	.	.	PM2BP4	VUS
chr7	92070042	92070042	G	T	AKAP9	NM_005751.5:c.6343G>T	p.A2115S	.	Uncertain_significance	0.066	0.361	T	0	0.026	B	0.001	0.04	B	2.06	0.308	16.59	.	.	8.2e-06	6.57e-05	6.99e-06	0	.	.	.	.	PM2BP4	VUS
chr7	92070915	92070915	G	A	AKAP9	NM_005751.5:c.6518G>A	p.R2173Q	rs749345540	Uncertain_significance	0.445	0.091	T	0.018	0.186	B	0.002	0.104	B	1.983	0.299	16.1	.	.	0.0001	0.0006	9.82e-05	0.002	0.0001	0.0005	.	.	BP4	VUS
chr7	92077828	92077828	C	G	AKAP9	NM_005751.5:c.6898C>G	p.Q2300E	rs778698845	NA	0.021	0.599	D	0.986	0.596	D	0.84	0.584	P	4.693	0.629	24.6	.	.	4.89e-05	0.0004	6.99e-06	0.0003	7.47e-05	0.0005	.	.	PM2PP3	VUS
chr7	92079659	92079659	G	A	AKAP9	NM_005751.5:c.7526G>A	p.S2509N	.	NA	0.324	0.227	T	0.053	0.211	B	0.053	0.243	B	3.324	0.458	22.9	.	.	.	.	6.98e-06	0	.	.	.	.	PM2BP4	VUS
chr7	92079749	92079749	A	G	AKAP9	NM_005751.5:c.7616A>G	p.K2539R	rs776353922	NA	0.017	0.512	D	0.412	0.333	B	0.168	0.335	B	2.082	0.311	16.74	.	.	4.07e-06	0	.	.	8.29e-06	0	.	.	PM2PP3	VUS
chr7	92080135	92080135	G	A	AKAP9	NM_005751.5:c.8002G>A	p.D2668N	rs758060247	NA	0.032	0.446	D	0.001	0.067	B	0.002	0.08	B	1.466	0.239	13.13	.	.	1.91e-05	0.0001	.	.	1.45e-05	8.09e-05	.	.	PM2BP4	VUS
chr7	92082658	92082658	T	G	AKAP9	NM_005751.5:c.8156T>G	p.L2719R	rs577370240	NA	0.001	0.784	D	1	0.899	D	0.999	0.916	D	5.728	0.782	26.9	0.000399	0.002	2.03e-05	0.0002	.	.	3.32e-05	0.0002	.	.	PP3	VUS
chr7	92084855	92084855	C	A	AKAP9	NM_005751.5:c.8747C>A	p.T2916K	rs146648044	NA	0.008	0.586	D	0.904	0.479	P	0.369	0.417	B	6.657	0.913	32	0.0002	0.001	0.0001	0.0005	0.0001	0.0016	0.0001	0.0006	0.0002	.	PP3	VUS
chr7	92089469	92089469	C	A	AKAP9	NM_005751.5:c.9298C>A	p.Q3100K	.	NA	0.002	0.721	D	0.998	0.715	D	0.995	0.818	D	6.161	0.85	28.5	.	.	.	.	.	.	.	.	.	.	PM2PP3	VUS
chr7	92095129	92095129	G	T	AKAP9	NM_005751.5:c.9685G>T	p.A3229S	.	NA	0.027	0.465	D	0.941	0.615	P	0.421	0.594	B	3.879	0.523	23.5	.	.	.	.	.	.	.	.	.	.	PM2PP3	VUS
chr7	92096939	92096939	A	G	AKAP9	NM_005751.5:c.9980A>G	p.Q3327R	rs750223708	NA	0.237	0.179	T	0.995	0.657	D	0.766	0.548	P	-0.045	0.089	2.177	.	.	1.63e-05	9.75e-05	.	.	2.47e-05	0.0002	.	.	PM2BP4	VUS
chr7	92097077	92097077	C	A	AKAP9	NM_005751.5:c.10118C>A	p.S3373Y	rs140470576	Conflicting_interpretations_of_pathogenicity	0.002	0.721	D	0.901	0.588	P	0.312	0.58	B	5.905	0.81	27.5	0.000599	0.0031	0.0014	0.0065	0.0007	0.0049	0.0015	0.0061	0.0016	0.001007	PP3	VUS
chr7	92102721	92102721	G	A	AKAP9	NM_005751.5:c.11225G>A	p.R3742Q	rs34101758	NA	0.013	0.614	D	0.999	0.899	D	0.91	0.85	D	7.773	0.955	35	.	.	2.44e-05	0	2.09e-05	0	3.3e-05	0	.	.	PM1PM2PP3	VUS
chr7	92102725	92102725	G	T	AKAP9	NM_005751.5:c.11229G>T	p.M3743I	rs143306820	Uncertain_significance	0.022	0.486	D	0.05	0.764	B	0.052	0.818	B	4.701	0.63	24.6	0.000599	.	0.0002	0.0008	0.0002	0.001	0.0002	0.0007	0.0007	.	PM1PP3	VUS
chr7	92105698	92105698	G	A	AKAP9	NM_005751.5:c.11351G>A	p.R3784Q	rs148635511	Uncertain_significance	0.003	0.682	D	1	0.899	D	0.995	0.818	D	7.776	0.955	35	.	.	4.06e-05	0	5.58e-05	0	7.42e-05	0	7.7e-05	.	PM1PM2PP3	VUS
chr7	92105709	92105709	G	A	AKAP9	NM_005751.5:c.11362G>A	p.V3788I	.	NA	0.045	0.408	D	0.965	0.689	D	0.549	0.639	P	5.246	0.709	25.6	.	.	.	.	.	.	.	.	.	.	PM2PP3	VUS
chr7	92107371	92107371	G	A	AKAP9	NM_005751.5:c.11495G>A	p.R3832H	rs781296769	Uncertain_significance	0.036	0.469	D	1	0.899	D	0.999	0.916	D	7.297	0.948	34	.	.	7.31e-05	0.0004	3.49e-05	0.0003	6.59e-05	0.0004	.	.	PM2PP3	VUS
chr7	92107395	92107395	T	C	AKAP9	NM_005751.5:c.11519T>C	p.I3840T	rs145675748	Conflicting_interpretations_of_pathogenicity	0.511	0.135	T	0.013	0.174	B	0.012	0.158	B	2.077	0.311	16.7	.	.	0.0001	0.0004	8.38e-05	0.0003	9.89e-05	0.0002	0.0002	0.001511	PM2BP4	VUS
chr7	92110131	92110131	C	T	AKAP9	NM_005751.5:c.11696C>T	p.T3899I	rs199577930	NA	0.081	0.654	T	0.001	0.102	B	0.001	0.121	B	2.191	0.324	17.45	0.000399	.	0.0001	3.43e-05	3.49e-05	0	0.0002	7.88e-05	.	.	PM2BP4	VUS
chr7	150945370	150945370	T	G	KCNH2	NM_000238.4:c.3475A>C	p.S1159R	.	NA	0	0.912	D	0.99	0.615	D	0.944	0.717	D	5.639	0.768	26.6	.	.	.	.	.	.	.	.	.	0.010682	PM2PP3BP1	VUS
chr7	150946885	150946885	G	C	KCNH2	NM_000238.4:c.3322C>G	p.L1108V	rs199473031	Conflicting_interpretations_of_pathogenicity	0.431	0.13	T	0.97	0.55	D	0.587	0.501	P	2.112	0.315	16.93	.	.	5.9e-05	0.0005	6.98e-06	0.0003	6.09e-05	0.0005	.	.	PP3BP1	VUS
chr7	150946978	150946978	C	T	KCNH2	NM_000238.4:c.3229G>A	p.A1077T	rs201382073	Uncertain_significance	0.001	0.784	D	0.036	0.261	B	0.009	0.158	B	5.167	0.697	25.5	0.0002	.	2.05e-05	6.56e-05	4.89e-05	0.0003	3.39e-05	6.66e-05	.	.	PM2PP3BP1	VUS
chr7	150947029	150947029	T	C	KCNH2	NM_000238.4:c.3178A>G	p.M1060V	rs767156792	Uncertain_significance	0.055	0.405	T	0.015	0.192	B	0.007	0.121	B	2.576	0.371	19.95	.	.	8.22e-06	6.58e-05	7.07e-06	0.0003	1.72e-05	0.0001	.	.	PM2BP1BP4	Likely Benign(II)
chr7	150947340	150947340	C	A	KCNH2	NM_000238.4:c.3140G>T	p.R1047L	rs36210421	Conflicting_interpretations_of_pathogenicity	0.054	0.386	T	0.039	0.22	B	0.028	0.231	B	5.379	0.729	25.9	0.008986	0.0031	0.0162	0.0031	0.0188	0.0043	0.0088	0.0039	0.0133	0.011654	PS3BS1BP1BP4	VUS
chr7	150947803	150947803	G	A	KCNH2	NM_000238.4:c.2768C>T	p.P923L	rs760408746	Uncertain_significance	0.126	0.272	T	0.327	0.314	B	0.011	0.173	B	3.233	0.448	22.8	.	.	2.46e-05	0.0001	6.99e-06	0.0003	0.0001	0.0002	.	.	PM2BP1BP4	Likely Benign(II)
chr7	150947807	150947807	G	A	KCNH2	NM_000238.4:c.2764C>T	p.R922W	rs199473440	Uncertain_significance	0.013	0.538	D	0.916	0.899	P	0.232	0.676	B	5.631	0.767	26.6	.	.	2.46e-05	0	1.4e-05	0	.	.	.	.	PM2PP3BP1	VUS
chr7	150948462	150948462	G	A	KCNH2	NM_000238.4:c.2674C>T	p.R892C	rs201627778	Conflicting_interpretations_of_pathogenicity	0.143	0.263	T	1	0.899	D	0.985	0.749	D	6.663	0.913	32	0.0002	0.001	0.0005	0.0025	0.0001	0.0033	0.0005	0.0022	0.0002	0.000504	PP3BP1	VUS
chr7	150948477	150948477	G	A	KCNH2	NM_000238.4:c.2659C>T	p.R887C	rs140279503	Uncertain_significance	0.021	0.506	D	1	0.899	D	0.985	0.749	D	5.896	0.809	27.4	.	.	2.87e-05	0.0001	0.0001	0	4.18e-05	0.0001	7.7e-05	.	PM2PP3BP1	VUS
chr7	150948488	150948488	C	T	KCNH2	NM_000238.4:c.2648G>A	p.R883Q	rs748821862	NA	0.024	0.477	D	0.839	0.445	P	0.098	0.336	B	2.934	0.413	22	.	.	2.86e-05	0.0002	.	.	4.17e-05	0.0002	.	0.000504	PM2PP3BP1	VUS
chr7	150948981	150948981	G	A	KCNH2	NM_000238.4:c.2467C>T	p.R823W	rs199473538	Pathogenic/Likely_pathogenic	0	0.912	D	1	0.899	D	0.997	0.85	D	6.735	0.919	32	.	.	4.06e-06	0	7e-06	0	.	.	.	.	PS3PM1PM2PP3PP5BP1	Pathogenic(IIIb)
chr7	150950140	150950140	A	C	KCNH2	NM_001204798.2:c.1406T>G	p.L469R	.	NA	0	0.912	D	0.032	0.352	B	0.016	0.309	B	1.036	0.193	10.86	.	.	.	.	3.52e-05	0	.	.	.	.	PM2BP1BP4	Likely Benign(II)
chr7	150950165	150950165	T	G	KCNH2	NM_001204798.2:c.1381A>C	p.M461L	.	NA	.	.	.	0.002	0.178	B	0.004	0.154	B	1.934	0.293	15.8	.	.	.	.	3.29e-05	0	.	.	.	.	PM2BP1BP4	Likely Benign(II)
chr7	150951463	150951463	C	T	KCNH2	NM_000238.4:c.1930G>A	p.V644I	rs199472972	Uncertain_significance	0.198	0.294	T	0.999	0.764	D	0.988	0.764	D	5.16	0.696	25.4	.	.	1.63e-05	9.75e-05	6.98e-06	0	3.3e-05	0.0002	.	.	PM1PM2PP3BP1	VUS
chr7	150951720	150951720	G	A	KCNH2	NM_000238.4:c.1673C>T	p.A558V	.	NA	0.13	0.299	T	1	0.899	D	0.996	0.832	D	4.706	0.631	24.6	.	.	1.22e-05	6.5e-05	.	.	.	.	.	.	PM1PM2PP3BP1	VUS
chr7	150952491	150952491	C	G	KCNH2	NM_000238.4:c.1491G>C	p.W497C	.	NA	0	0.912	D	1	0.899	D	0.999	0.971	D	6.665	0.913	32	.	.	.	.	.	.	.	.	.	.	PM1PM2PP3BP1	VUS
chr7	150952556	150952556	C	T	KCNH2	NM_000238.4:c.1426G>A	p.V476I	rs199472908	Uncertain_significance	0.015	0.524	D	0.999	0.899	D	0.993	0.916	D	6.337	0.875	29.3	.	.	8.12e-06	3.25e-05	6.98e-06	0	.	.	.	.	PM1PM2PP3BP1	VUS
chr7	150955478	150955478	C	T	KCNH2	NM_001204798.2:c.26G>A	p.S9N	.	NA	0.028	0.461	D	0.514	0.355	P	0.096	0.312	B	0.802	0.17	9.474	.	.	.	.	.	.	.	.	.	.	PM2BP1BP4	Likely Benign(II)
chr7	150957380	150957380	G	A	KCNH2	NM_000238.4:c.1039C>T	p.P347S	rs138776684	Conflicting_interpretations_of_pathogenicity	0.455	0.088	T	0.316	0.416	B	0.066	0.413	B	2.578	0.371	19.96	0.000799	0.0031	0.0011	0.0025	0.0006	0.002	0.0014	0.0025	0.0005	0.000505	BS3BP1BP4	Likely Benign(II)
chr7	150958110	150958110	C	T	KCNH2	NM_000238.4:c.865G>A	p.E289K	rs199472880	Uncertain_significance	0.122	0.276	T	0.114	0.322	B	0.009	0.243	B	4.178	0.56	23.8	.	.	0.0003	0	9.79e-05	0.0003	.	.	.	.	PM2BP1BP4	VUS
chr7	150958200	150958200	C	T	KCNH2	NM_000238.4:c.775G>A	p.D259N	rs199472876	Uncertain_significance	0.004	0.654	D	0.056	0.566	B	0.009	0.501	B	3.091	0.431	22.5	.	.	2.83e-05	0.0001	7e-06	0	0.0005	0.0006	.	.	PM2PP3BP1	VUS
chr7	150958319	150958319	T	A	KCNH2	NM_000238.4:c.656A>T	p.D219V	rs587777907	Uncertain_significance	0.092	0.316	T	0.652	0.388	P	0.113	0.371	B	1.983	0.299	16.11	.	.	2.03e-05	0.0001	.	.	0.0002	0.0003	.	.	PS3PM2BP1BP4	VUS
chr7	150958499	150958499	C	T	KCNH2	NM_000238.4:c.476G>A	p.R159H	rs1016201425	NA	0.017	0.512	D	0.999	0.764	D	0.893	0.616	P	7.035	0.939	33	.	.	0	0	6.98e-06	0	.	.	.	0.002522	PM2PP3BP1	VUS
chr7	150959602	150959602	G	A	KCNH2	NM_000238.4:c.442C>T	p.R148W	rs139544114	Conflicting_interpretations_of_pathogenicity	0.003	0.682	D	0	0.715	B	0	0.513	B	4.974	0.669	25.1	0.000599	0.001	0.0012	0.0015	0.0006	0.001	0.0011	0.0015	0.0012	0.000504	PP1PP3BP1	VUS
chr10	18261294	18261294	C	T	CACNB2	NM_000724.4:c.25C>T	p.R9C	.	NA	0.01	0.564	D	1	0.899	D	0.973	0.764	D	3.046	0.426	22.4	.	.	6.72e-06	4.38e-05	1.4e-05	0	.	.	.	.	PM2PP3	VUS
chr10	18340934	18340934	A	G	CACNB2	NM_201590.3:c.8A>G	p.D3G	.	NA	0.05	0.395	D	0.805	0.67	P	0.539	0.736	P	2.033	0.305	16.42	.	.	.	.	.	.	.	.	.	.	PM2PP3	VUS
chr10	18340939	18340939	C	A	CACNB2	NM_201590.3:c.13C>A	p.R5S	.	NA	0.199	0.204	T	0.4	0.33	B	0.022	0.198	B	2.152	0.32	17.2	.	.	.	.	.	.	.	.	.	.	PM2BP4	VUS
chr10	18500855	18500855	G	C	CACNB2	NM_201596.3:c.500G>C	p.G167A	rs772195020	NA	0	0.912	D	0.956	0.67	P	0.799	0.686	P	5.716	0.78	26.9	.	.	1.22e-05	9.75e-05	.	.	1.65e-05	0.0001	.	.	PM2PP3	VUS
chr10	18506518	18506518	G	C	CACNB2	NM_201596.3:c.641G>C	p.S214T	rs149253719	Conflicting_interpretations_of_pathogenicity	0.01	0.564	D	0.004	0.425	B	0.002	0.424	B	2.683	0.384	20.7	0.001797	0.0031	0.001	0.0012	0.0008	0.0016	0.001	0.0014	0.0008	0.005035	PP3	VUS
chr10	18506545	18506545	C	A	CACNB2	NM_201596.3:c.668C>A	p.S223Y	.	NA	0.001	0.784	D	0.966	0.899	D	0.781	0.916	P	6.665	0.913	32	.	.	.	.	.	.	.	.	.	.	PM2PP3	VUS
chr10	18514283	18514283	C	G	CACNB2	NM_201596.3:c.718C>G	p.P240A	rs750627674	NA	0.153	0.262	T	0.894	0.764	P	0.437	0.807	B	2.618	0.376	20.3	.	.	4.07e-05	0.0003	.	.	5.77e-05	0.0004	.	.	PM2BP4	VUS
chr10	18515033	18515033	C	T	CACNB2	NM_201572.4:c.640C>T	p.R214W	rs377255285	NA	0.026	0.469	D	0	0.026	B	0	0.013	B	1.945	0.295	15.87	.	.	1.22e-05	0	6.98e-06	0	2.5e-05	0	7.7e-05	.	PM2PP3	VUS
chr10	18538309	18538309	C	T	CACNB2	NM_201596.3:c.1432C>T	p.R478C	rs551742573	Uncertain_significance	0	0.912	D	0.999	0.899	D	0.915	0.807	D	7.932	0.956	35	.	.	3.66e-05	3.25e-05	1.4e-05	0	3.3e-05	0	.	.	PM2PP3	VUS
chr10	18538310	18538310	G	A	CACNB2	NM_201596.3:c.1433G>A	p.R478H	rs781646326	Uncertain_significance	0.002	0.784	D	0.998	0.899	D	0.915	0.759	D	7.171	0.944	34	.	.	3.25e-05	3.25e-05	4.89e-05	0.0003	3.3e-05	0	.	.	PM2PP3	VUS
chr10	18538318	18538318	G	T	CACNB2	NM_201596.3:c.1441G>T	p.A481S	.	NA	0.123	0.276	T	0.003	0.592	B	0.005	0.466	B	2.303	0.338	18.19	.	.	.	.	.	.	.	.	.	.	PM2BP4	VUS
chr10	18539257	18539257	C	T	CACNB2	NM_201596.3:c.1516C>T	p.R506C	rs111250176	Uncertain_significance	0.005	0.654	D	0.767	0.764	P	0.183	0.582	B	6.258	0.864	28.9	.	.	4.47e-05	0	2.79e-05	0	3.3e-05	0	0.0002	.	PM2PP3	VUS
chr10	18539263	18539263	G	A	CACNB2	NM_201596.3:c.1522G>A	p.A508T	rs759958799	Conflicting_interpretations_of_pathogenicity	0.217	0.206	T	0.196	0.764	B	0.017	0.594	B	3.69	0.5	23.3	.	.	0.0002	0.0009	3.49e-05	0.0003	0.0001	0.0008	.	.	BP4	VUS
chr10	18539437	18539437	G	A	CACNB2	NM_201596.3:c.1696G>A	p.A566T	rs202218948	Conflicting_interpretations_of_pathogenicity	0.021	0.501	D	0.003	0.596	B	0.004	0.532	B	2.755	0.392	21.1	0.000998	0.0051	0.0008	0.0049	0.0002	0.0036	0.0008	0.0051	.	0.000504	PP3	VUS
chr10	18539458	18539458	G	T	CACNB2	NM_201596.3:c.1717G>T	p.D573Y	rs982811357	NA	0.001	0.784	D	0.828	0.899	P	0.34	0.728	B	4.462	0.597	24.2	.	.	.	.	6.98e-06	0	.	.	.	.	PM2PP3	VUS
chr10	18539558	18539558	G	C	CACNB2	NM_201596.3:c.1817G>C	p.R606P	rs577739840	Uncertain_significance	0.004	0.654	D	0.625	0.899	P	0.301	0.749	B	4.973	0.669	25.1	.	.	0.0001	0.0004	8.41e-05	0.0007	0.0002	0.0004	.	0.000504	PP3	VUS
chr10	18539588	18539588	A	G	CACNB2	NM_201596.3:c.1847A>G	p.Q616R	.	NA	0.022	0.512	D	0.037	0.539	B	0.016	0.5	B	1.602	0.254	13.86	.	.	.	.	.	.	.	.	.	.	PM2BP4	VUS
chr10	18539618	18539618	G	A	CACNB2	NM_201596.3:c.1877G>A	p.S626N	rs765929062	NA	0.732	0.04	T	0.967	0.715	D	0.878	0.797	P	1.101	0.2	11.22	.	.	4.07e-06	3.25e-05	.	.	8.27e-06	6.06e-05	.	.	PM2BP4	VUS
chr11	2445228	2445228	G	A	KCNQ1	NM_000218.3:c.130G>A	p.G44S	.	NA	0.38	0.112	T	0.201	0.28	B	0.012	0.149	B	2.039	0.306	16.46	.	.	.	.	.	.	.	.	.	.	PM2BP4	VUS
chr11	2445252	2445252	G	C	KCNQ1	NM_000218.3:c.154G>C	p.A52P	.	NA	0.015	0.524	D	0.999	0.764	D	0.979	0.728	D	3.541	0.483	23.1	.	.	.	.	.	.	.	.	.	.	PM2PP3	VUS
chr11	2445362	2445362	C	G	KCNQ1	NM_000218.3:c.264C>G	p.D88E	.	NA	0.23	0.183	T	0.994	0.647	D	0.877	0.604	P	-0.958	0.034	0.019	.	.	4.57e-06	3.3e-05	.	.	.	.	.	.	PM2BP4	VUS
chr11	2527941	2527941	C	A	KCNQ1	NM_000218.3:c.400C>A	p.L134M	.	NA	0.008	0.654	D	1	0.899	D	0.999	0.916	D	5.897	0.809	27.5	.	.	.	.	.	.	.	.	.	.	PM1PM2PP3	VUS
chr11	2570706	2570706	G	A	KCNQ1	NM_000218.3:c.556G>A	p.G186S	rs199473398	Uncertain_significance	0.003	0.784	D	1	0.899	D	1	0.971	D	6.527	0.899	31	.	.	.	.	.	.	.	.	.	.	PM1PM2PP3	VUS
chr11	2572048	2572048	A	G	KCNQ1	NM_000218.3:c.719A>G	p.H240R	rs533669726	NA	1	0.01	T	1	0.899	D	0.997	0.875	D	1.351	0.226	12.53	0.0002	0.001	3.27e-05	0.0003	.	.	4.34e-05	0.0003	.	.	PM1PP1BP4	VUS
chr11	2587642	2587642	C	T	KCNQ1	NM_000218.3:c.1201C>T	p.R401W	rs766616232	Uncertain_significance	0.023	0.531	D	0.998	0.764	D	0.888	0.613	P	6.227	0.86	28.8	.	.	7.72e-05	6.5e-05	6.98e-05	0	4.95e-05	0	.	.	PM2PP3	VUS
chr11	2662012	2662012	C	A	KCNQ1	NM_000218.3:c.1445C>A	p.T482N	rs551775986	NA	0.066	0.361	T	0.787	0.438	P	0.29	0.431	B	2.494	0.361	19.43	.	.	1.22e-05	9.75e-05	.	.	8.24e-06	6.06e-05	.	.	PM2BP4	VUS
chr11	2768899	2768899	G	T	KCNQ1	NM_000218.3:c.1570G>T	p.V524L	.	NA	0.148	0.248	T	0.327	0.325	B	0.164	0.374	B	5.05	0.68	25.2	.	.	.	.	.	.	.	.	.	.	PM1PM2PM5BP4	Likely Pathogenic(IV)
chr11	2768905	2768905	A	C	KCNQ1	NM_000218.3:c.1576A>C	p.K526Q	rs199472792	Uncertain_significance	0.001	0.784	D	0.981	0.592	D	0.876	0.643	P	6.111	0.842	28.3	.	.	1.63e-05	9.75e-05	.	.	2.48e-05	0.0002	.	.	PM1PM2PP3	VUS
chr11	74457323	74457323	G	A	KCNE3	NM_005472.5:c.241C>T	p.R81C	rs542842233	Uncertain_significance	0	0.912	D	0.018	0.165	B	0.011	0.145	B	5.393	0.731	26	0.0002	0.001	4.06e-05	3.25e-05	4.89e-05	0	3.31e-05	0.0001	.	.	PM1PP3	VUS
chr11	74457515	74457515	C	T	KCNE3	NM_005472.5:c.49G>A	p.V17M	rs773287275	Uncertain_significance	0.146	0.912	T	1	0.899	D	0.996	0.832	D	3.922	0.528	23.5	.	.	4.88e-05	0.0004	2.09e-05	0	4.95e-05	0.0003	.	.	PS3PM2PP3	Likely Pathogenic(II)
chr11	118145179	118145179	C	G	SCN4B	NM_174934.4:c.112G>C	p.A38P	rs777894412	Conflicting_interpretations_of_pathogenicity	0.205	0.2	T	0.873	0.46	P	0.602	0.49	P	2.942	0.414	22	.	.	0.0004	0.0029	4.58e-05	0.0022	0.0004	0.003	.	0.000504	PM1PP3	VUS
chr11	118152652	118152652	C	T	SCN4B	NM_174934.4:c.22G>A	p.G8S	rs149868494	Conflicting_interpretations_of_pathogenicity	0.024	0.477	D	0.964	0.539	D	0.692	0.52	P	4.095	0.55	23.7	0.000599	.	0.0004	0.0003	8.37e-05	0	0.0005	0.0003	.	.	PS4PP3	VUS
chr11	118166906	118166906	G	T	SCN2B	NM_004588.5:c.629C>A	p.P210Q	.	NA	0.04	0.421	D	0.161	0.267	B	0.041	0.226	B	2.689	0.384	20.7	.	.	.	.	.	.	.	.	.	.	PM2PP3	VUS
chr11	118168115	118168115	C	T	SCN2B	NM_004588.5:c.418G>A	p.G140S	.	NA	0.458	0.088	T	0.984	0.588	D	0.85	0.589	P	4.62	0.619	24.5	.	.	.	.	.	.	.	.	.	.	PM1PM2PP3	VUS
chr11	118168253	118168253	G	A	SCN2B	NM_004588.5:c.280C>T	p.R94W	rs760016611	NA	0.017	0.512	D	0.998	0.715	D	0.822	0.573	P	6.747	0.921	32	.	.	1.62e-05	3.25e-05	6.98e-06	0.0003	1.65e-05	0	.	.	PM1PM2PP3	VUS
chr11	123642563	123642563	C	T	SCN3B	NM_001040151.2:c.328G>A	p.V110I	rs147205617	Conflicting_interpretations_of_pathogenicity	0.138	0.337	T	0.999	0.764	D	0.988	0.764	D	5.938	0.815	27.6	0.000399	.	0.0003	0.0005	0.0003	0.001	0.0003	0.0004	0.0004	.	PS3PM1PP3	Likely Pathogenic(II)
chr11	123645630	123645630	A	G	SCN3B	NM_001040151.2:c.176T>C	p.V59A	.	NA	0.481	0.115	T	0.451	0.342	B	0.12	0.306	B	2.143	0.319	17.13	.	.	.	.	.	.	.	.	.	.	PM1PM2BP4	VUS
chr11	128911283	128911283	G	A	KCNJ5	NM_000890.5:c.10G>A	p.D4N	rs529755922	Conflicting_interpretations_of_pathogenicity	0	0.912	D	0.099	0.241	B	0.027	0.198	B	5.26	0.711	25.7	0.0002	.	6.91e-05	3.25e-05	2.09e-05	0	3.32e-05	0	.	.	PM2PP3	VUS
chr11	128911406	128911406	G	A	KCNJ5	NM_000890.5:c.133G>A	p.E45K	rs372447456	Conflicting_interpretations_of_pathogenicity	0.35	0.123	T	0.452	0.343	B	0.107	0.296	B	2.527	0.365	19.64	.	.	6.5e-05	0.0002	0.0001	0.0003	0.0001	0.0002	7.7e-05	.	PM2BP4	VUS
chr11	128911480	128911480	G	T	KCNJ5	NM_000890.5:c.207G>T	p.E69D	.	NA	0.125	0.273	T	0.995	0.657	D	0.992	0.79	D	2.297	0.337	18.15	.	.	.	.	.	.	.	.	.	.	PM1PM2PP3	VUS
chr11	128911703	128911703	A	G	KCNJ5	NM_000890.5:c.430A>G	p.I144V	rs369703183	Conflicting_interpretations_of_pathogenicity	0.298	0.146	T	0.948	0.516	P	0.979	0.728	D	2.622	0.376	20.3	0.0002	.	2.44e-05	9.75e-05	2.79e-05	0.0003	2.47e-05	6.06e-05	.	.	PP3PM2PM1	VUS
chr11	128912196	128912196	T	G	KCNJ5	NM_000890.5:c.923T>G	p.M308R	rs750690159	NA	0	0.912	D	0.996	0.67	D	0.882	0.608	P	5.684	0.775	26.8	.	.	1.73e-05	0.0001	6.98e-06	0.0003	2.54e-05	0.0002	.	.	PM1PM2PP3	VUS
chr11	128916595	128916595	G	A	KCNJ5	NM_000890.5:c.1124G>A	p.R375Q	rs530587789	Uncertain_significance	0.442	0.092	T	0	0.026	B	0.001	0.04	B	3.436	0.471	23	0.0002	0.001	4.87e-05	0.0001	4.89e-05	0	6.61e-05	0.0002	.	.	BP4	VUS
chr11	128916617	128916617	C	G	KCNJ5	NM_000890.5:c.1146C>G	p.S382R	rs987817877	NA	0.035	0.437	D	0.241	0.292	B	0.124	0.31	B	-0.532	0.054	0.183	.	.	.	.	.	.	.	.	.	.	PM2BP4	VUS
chr12	2115308	2115308	C	A	CACNA1C	NM_000719.7:c.134C>A	p.T45N	.	NA	0.004	0.654	D	0.649	0.409	P	0.439	0.439	B	2.402	0.35	18.83	.	.	.	.	.	.	.	.	.	.	PM2PP2PP3	VUS
chr12	2549945	2549945	A	G	CACNA1C	NM_000719.7:c.1393A>G	p.S465G	.	NA	0.049	0.491	D	0.967	0.67	D	0.755	0.774	P	2.874	0.406	21.7	.	.	.	.	.	.	.	.	.	.	PM2PP2PP3	VUS
chr12	2556956	2556956	G	A	CACNA1C	NM_000719.7:c.1487G>A	p.R496Q	rs369255950	Uncertain_significance	0.108	0.294	T	0.054	0.899	B	0.011	0.764	B	4.74	0.636	24.7	.	.	4.47e-05	0.0002	4.19e-05	0.0003	4.97e-05	0.0002	0.0002	.	PM2PP2BP4	VUS
chr12	2581608	2581608	C	A	CACNA1C	NM_000719.7:c.1914C>A	p.S638R	.	NA	0.449	0.097	T	0.883	0.647	P	0.51	0.742	P	3.187	0.442	22.7	.	.	5.69e-06	0	.	.	.	.	.	.	PM1PM2PP2PP3	Likely Pathogenic(V)
chr12	2585447	2585447	T	C	CACNA1C	NM_000719.7:c.2411T>C	p.I804T	rs940278147	NA	0.237	0.224	T	0.73	0.67	P	0.279	0.774	B	3.656	0.496	23.2	.	.	9.17e-06	0	.	.	.	.	.	.	PM2PP2BP4	VUS
chr12	2593255	2593255	G	A	CACNA1C	NM_000719.7:c.2573G>A	p.R858H	rs786205753	Pathogenic/Likely_pathogenic	0.035	0.518	D	1	0.899	D	0.997	0.916	D	6.739	0.92	32	.	.	.	.	.	.	.	.	.	.	PS3PM2PP2PP3PP5	Likely Pathogenic(II)
chr12	2597249	2597249	T	C	CACNA1C	NM_000719.7:c.2813T>C	p.I938T	rs377165829	Uncertain_significance	0.004	0.654	D	0.227	0.457	B	0.176	0.413	B	2.7	0.386	20.8	.	.	2.44e-05	0.0001	2.79e-05	0	1.66e-05	0.0001	8.4e-05	0.001007	PM1PM2PP2PP3	Likely Pathogenic(V)
chr12	2597273	2597273	T	C	CACNA1C	NM_000719.7:c.2837T>C	p.I946T	rs747728381	Uncertain_significance	0.023	0.481	D	0.227	0.294	B	0.068	0.321	B	3.761	0.509	23.3	.	.	2.44e-05	0	1.4e-05	0	8.29e-06	0	.	.	PM1PM2PP2PP3	Likely Pathogenic(V)
chr12	2606654	2606654	C	T	CACNA1C	NM_000719.7:c.3200C>T	p.A1067V	rs750998195	Conflicting_interpretations_of_pathogenicity	0.042	0.424	D	1	0.899	D	0.994	0.807	D	4.174	0.56	23.8	.	.	0.0001	0.0002	7.69e-05	0.0003	0.0002	0.0003	.	.	PM1PM2PP2PP3	Likely Pathogenic(V)
chr12	2610673	2610673	C	T	CACNA1C	NM_000719.7:c.3691C>T	p.L1231F	rs766971426	NA	0.084	0.339	T	0.999	0.899	D	0.995	0.916	D	6.241	0.862	28.9	.	.	8.12e-06	6.5e-05	.	.	8.27e-06	6.06e-05	.	.	PM1PM2PP2PP3	Likely Pathogenic(V)
chr12	2648488	2648488	C	G	CACNA1C	NM_000719.7:c.3926C>G	p.T1309S	.	Uncertain_significance	0.554	0.124	T	0.204	0.319	B	0.115	0.365	B	2.161	0.321	17.25	.	.	.	.	.	.	.	.	.	.	PM1PM2PP2BP4	VUS
chr12	2651628	2651628	G	A	CACNA1C	NM_001129829.2:c.4000G>A	p.D1334N	rs41276706	Conflicting_interpretations_of_pathogenicity	0.158	0.239	T	0	0.026	B	0	0.013	B	2.094	0.313	16.82	.	.	0.0002	0.0006	0.0002	0.0013	0.0002	0.0003	0.0002	0.001511	PP2BP4	VUS
chr12	2674633	2674633	C	T	CACNA1C	NM_000719.7:c.4819C>T	p.P1607S	rs745938574	Uncertain_significance	0.005	0.912	D	0.021	0.899	B	0.03	0.916	B	6.902	0.932	33	.	.	1.18e-05	0	1.4e-05	0	3.93e-05	0	.	0.00051	PM1PM2PP2PP3	Likely Pathogenic(V)
chr12	2679622	2679622	G	T	CACNA1C	NM_000719.7:c.5270G>T	p.S1757I	rs753388569	NA	0.05	0.784	D	0.609	0.899	P	0.168	0.875	B	2.487	0.36	19.38	.	.	4.09e-06	3.25e-05	.	.	8.52e-06	6.18e-05	.	.	PM1PM2PP2PP3	Likely Pathogenic(V)
chr12	2679672	2679672	G	A	CACNA1C	NM_000719.7:c.5320G>A	p.A1774T	rs767425352	NA	0.243	0.393	T	0.5	0.581	P	0.102	0.477	B	3.125	0.435	22.6	.	.	2.06e-05	9.78e-05	3.49e-05	0	2.61e-05	0.0001	.	.	PM2PP2BP4PM1	VUS
chr12	2679760	2679760	G	A	CACNA1C	NM_000719.7:c.5408G>A	p.R1803Q	rs201918158	Uncertain_significance	0.167	0.405	T	0.342	0.447	B	0.051	0.395	B	2.953	0.415	22.1	.	.	1.49e-05	3.74e-05	2.79e-05	0	.	.	.	.	PM1PM2PP2BP4	VUS
chr12	2686169	2686169	G	A	CACNA1C	NM_000719.7:c.5684G>A	p.R1895Q	rs753954220	Uncertain_significance	0.034	0.473	D	0.999	0.899	D	0.895	0.832	P	5.694	0.777	26.8	.	.	4.47e-05	0	2.09e-05	0	4.14e-05	0	.	.	PM2PP2PP3PM1	Likely Pathogenic(V)
chr12	2686222	2686222	G	A	CACNA1C	NM_000719.7:c.5737G>A	p.D1913N	rs181502604	Uncertain_significance	0.245	0.216	T	0.57	0.484	P	0.142	0.499	B	3.259	0.451	22.8	0.000399	0.001	4.06e-05	9.75e-05	6.98e-06	0	7.45e-05	0.0001	.	.	PP2BP4	VUS
chr12	2688490	2688490	A	C	CACNA1C	NM_000719.7:c.5828A>C	p.H1943P	.	NA	0.021	0.524	D	0.529	0.899	P	0.304	0.875	B	1.968	0.297	16.01	.	.	4.1e-06	3.25e-05	.	.	.	.	.	.	PM2PP2PP3	VUS
chr12	2688517	2688517	T	C	CACNA1C	NM_000719.7:c.5855T>C	p.F1952S	.	NA	0.033	0.453	D	0	0.026	B	0	0.04	B	1.893	0.288	15.55	.	.	.	.	.	.	.	.	.	.	PM2PP2PP3	VUS
chr12	2688547	2688547	G	A	CACNA1C	NM_000719.7:c.5885G>A	p.R1962Q	rs199776761	Uncertain_significance	0.096	0.329	T	0.003	0.27	B	0.004	0.162	B	2.113	0.315	16.94	0.000599	.	9.39e-05	0	0.0003	0	0.0001	0	0.0002	.	PP2BP4	VUS
chr12	2691092	2691092	G	A	CACNA1C	NM_000719.7:c.6310G>A	p.G2104R	.	NA	0.057	0.433	T	0.996	0.899	D	0.957	0.971	D	5.031	0.677	25.2	.	.	0	0	.	.	.	.	.	.	PM2PP2PP3	VUS
chr12	21766325	21766325	C	A	KCNJ8	NM_004982.4:c.673G>T	p.V225L	.	NA	0.03	0.453	D	0.776	0.422	P	0.461	0.446	P	5.936	0.815	27.6	.	.	.	.	.	.	.	.	.	.	PM1PM2PP3	VUS
chr12	21766528	21766528	G	T	KCNJ8	NM_004982.4:c.470C>A	p.T157K	.	NA	0.007	0.599	D	0.683	0.396	P	0.358	0.413	B	4.301	0.576	24	.	.	.	.	.	.	.	.	.	.	PM1PM2PP3	VUS
chr12	21848159	21848159	C	T	ABCC9	NM_005691.4:c.2857G>A	p.E953K	rs143685061	Uncertain_significance	0.281	0.154	T	0.951	0.52	P	0.495	0.457	P	4.655	0.624	24.5	.	.	3.66e-05	6.5e-05	3.49e-05	0.0003	3.31e-05	6.06e-05	7.7e-05	.	PM2PP2PP3	VUS
chr12	21859617	21859617	G	A	ABCC9	NM_005691.4:c.2474C>T	p.A825V	rs964127282	Uncertain_significance	0.003	0.721	D	1	0.899	D	0.987	0.759	D	7.067	0.94	33	.	.	4.06e-06	0	6.99e-06	0	.	.	.	.	PM1PM2PP2PP3	Likely Pathogenic(V)
chr12	21875696	21875696	C	T	ABCC9	NM_005691.4:c.2050G>A	p.G684S	rs148174226	Conflicting_interpretations_of_pathogenicity	0.238	0.179	T	0.027	0.182	B	0.016	0.166	B	3.174	0.441	22.7	0.000599	0.001	0.0008	0.0035	0.0004	0.003	0.001	0.0035	0.0008	0.001007	BP4PP2	VUS
chr12	21887878	21887878	C	T	ABCC9	NM_005691.4:c.1859G>A	p.R620Q	rs139539832	Uncertain_significance	0.619	0.136	T	0.814	0.484	P	0.102	0.308	B	3.031	0.424	22.3	.	.	1.63e-05	3.25e-05	2.1e-05	0	3.31e-05	6.08e-05	0.0002	.	PM2PP2BP4	VUS
chr12	21910159	21910159	G	C	ABCC9	NM_005691.4:c.1318C>G	p.Q440E	.	NA	0.002	0.721	D	0.993	0.637	D	0.916	0.634	D	5.584	0.76	26.5	.	.	.	.	.	.	.	.	.	.	PM1PM2PP2PP3	Likely Pathogenic(V)
chr12	21926045	21926045	G	T	ABCC9	NM_005691.4:c.303C>A	p.H101Q	.	NA	0.27	0.197	T	0.981	0.577	D	0.908	0.627	P	0.646	0.156	8.472	.	.	.	.	.	.	.	.	.	.	PM2PP2BP4	VUS
chr12	21926059	21926059	G	A	ABCC9	NM_005691.4:c.289C>T	p.R97W	rs727502875	Uncertain_significance	0.182	0.243	T	0.987	0.6	D	0.781	0.555	P	2.555	0.368	19.82	.	.	8.12e-06	0	.	.	1.65e-05	0	.	.	PM2PP2PP3	VUS
chr12	32792439	32792439	G	T	PKP2	NM_004572.4:c.2631C>A	p.H877Q	rs202094467	Conflicting_interpretations_of_pathogenicity	0.024	0.518	D	0.985	0.592	D	0.693	0.52	P	5.5	0.747	26.2	.	.	0.0002	0.0014	1.4e-05	0.0007	0.0002	0.0013	.	.	PP3BP1	VUS
chr12	32792721	32792721	T	G	PKP2	NM_004572.4:c.2500A>C	p.N834H	.	NA	0.076	0.351	T	0.017	0.196	B	0.007	0.149	B	2.893	0.408	21.8	.	.	.	.	.	.	.	.	.	.	PM2BP1BP4	Likely Benign(II)
chr12	32796167	32796167	G	T	PKP2	NM_004572.4:c.2431C>A	p.R811S	rs139734328	Conflicting_interpretations_of_pathogenicity	0.008	0.632	D	0.267	0.338	B	0.219	0.36	B	7.211	0.946	34	0.000599	.	0.0009	0.0005	0.0007	0.0007	0.0009	0.0006	0.0004	0.005539	PP3BP1	VUS
chr12	32802474	32802474	G	T	PKP2	NM_004572.4:c.2228C>A	p.P743Q	.	NA	0.076	0.421	T	0.928	0.574	P	0.571	0.481	P	0.587	0.15	8.066	.	.	.	.	.	.	.	.	.	.	PM2BP1BP4	Likely Benign(II)
chr12	32821361	32821361	C	T	PKP2	NM_004572.4:c.2140G>A	p.G714R	.	NA	0.11	0.469	T	1	0.899	D	0.998	0.875	D	6.299	0.87	29.1	.	.	.	.	.	.	.	.	.	.	PM2PP3BP1	VUS
chr12	32821418	32821418	G	A	PKP2	NM_004572.4:c.2083C>T	p.R695C	rs199583774	Uncertain_significance	0.001	0.784	D	1	0.899	D	0.996	0.832	D	7.044	0.939	33	0.0002	.	0.0001	0.0003	0.0002	0	0.0001	0.0002	.	0.000504	PM2PP3BP1	VUS
chr12	32821426	32821426	T	C	PKP2	NM_004572.4:c.2075A>G	p.K692R	rs776915959	Uncertain_significance	0.149	0.275	T	0.663	0.45	P	0.342	0.407	B	3.668	0.498	23.2	.	.	1.22e-05	3.25e-05	2.09e-05	0	8.24e-06	6.06e-05	.	.	PM2BP1BP4	Likely Benign(II)
chr12	32824045	32824045	C	A	PKP2	NM_004572.4:c.1806G>T	p.K602N	.	Uncertain_significance	0.001	0.784	D	1	0.899	D	0.998	0.875	D	6.213	0.858	28.7	.	.	.	.	.	.	.	.	.	.	PM2PP3BP1	VUS
chr12	32824056	32824056	G	T	PKP2	NM_004572.4:c.1795C>A	p.P599T	rs771808028	Uncertain_significance	0.175	0.224	T	0.991	0.622	D	0.902	0.623	P	4.646	0.622	24.5	.	.	2.85e-05	0.0002	1.4e-05	0.0007	8.24e-06	6.06e-05	.	.	PP3BP1	VUS
chr12	32824143	32824143	C	T	PKP2	NM_004572.4:c.1708G>A	p.A570T	rs558637427	Uncertain_significance	0.021	0.491	D	0.003	0.112	B	0.001	0.04	B	5.155	0.695	25.4	0.0002	.	2.44e-05	6.5e-05	4.89e-05	0.0007	1.65e-05	6.06e-05	.	.	PP3BP1	VUS
chr12	32841056	32841056	T	C	PKP2	NM_004572.4:c.1660A>G	p.I554V	rs397517002	Uncertain_significance	0.469	0.085	T	0.889	0.539	P	0.702	0.524	P	3.055	0.427	22.4	.	.	2.85e-05	0.0001	.	.	3.3e-05	0.0002	.	.	PM2PP3BP1	VUS
chr12	32850772	32850772	T	C	PKP2	NM_004572.4:c.1372A>G	p.I458V	rs199571473	Conflicting_interpretations_of_pathogenicity	0.329	0.132	T	0.783	0.527	P	0.588	0.527	P	4.775	0.641	24.7	0.001597	0.0082	0.0011	0.0086	0.0003	0.0112	0.0013	0.0091	.	0.005482	PP3BP1BS1	Likely Benign(I)
chr12	32850906	32850906	C	A	PKP2	NM_004572.4:c.1238G>T	p.R413L	.	NA	0.033	0.457	D	0.98	0.588	D	0.703	0.568	P	5.141	0.693	25.4	.	.	.	.	.	.	.	.	.	.	PM1PM2PP3BP1	VUS
chr12	32877856	32877856	A	G	PKP2	NM_004572.4:c.1024T>C	p.S342P	rs563797120	Uncertain_significance	0.046	0.405	D	0	0.026	B	0.001	0.04	B	1.208	0.211	11.79	0.000399	0.002	1.23e-05	9.76e-05	.	.	2.57e-05	0.0002	.	.	BP1BP4BP6	Likely Benign(II)
chr12	32878167	32878167	G	A	PKP2	NM_004572.4:c.713C>T	p.P238L	rs560220280	Uncertain_significance	0	0.912	D	0.999	0.764	D	0.905	0.625	P	6.16	0.85	28.5	0.0002	0.001	4.47e-05	0.0004	2.79e-05	0.001	4.13e-05	0.0003	.	0.000504	PP3BP1	VUS
chr12	32878444	32878444	T	C	PKP2	NM_004572.4:c.436A>G	p.R146G	.	NA	0.012	0.599	D	0.763	0.427	P	0.288	0.389	B	1.81	0.278	15.04	.	.	.	.	.	.	.	.	.	.	PM2PP3BP1	VUS
chr12	32878461	32878461	G	A	PKP2	NM_004572.4:c.419C>T	p.S140F	rs150821281	Conflicting_interpretations_of_pathogenicity	0.055	0.403	T	0.007	0.131	B	0.006	0.112	B	2.985	0.419	22.2	0.001198	0.002	0.0023	0.0015	0.0025	0.001	0.0023	0.0018	0.002	0.000504	BS3BP1BP4	Likely Benign(II)
chr12	32879009	32879009	C	A	PKP2	NM_004572.4:c.247G>T	p.V83F	.	NA	0.112	0.305	T	0.397	0.412	B	0.189	0.346	B	5.535	0.752	26.3	.	.	.	.	.	.	.	.	.	.	PM2BP1BP4	Likely Benign(II)
chr12	32896509	32896509	C	T	PKP2	NM_004572.4:c.223G>A	p.G75R	rs765852160	Uncertain_significance	0	0.912	D	0.94	0.508	P	0.288	0.389	B	5.823	0.797	27.2	.	.	3.01e-05	0.0002	.	.	2.48e-05	0.0003	.	.	PM2PP3BP1	VUS
chr12	32896634	32896634	G	T	PKP2	NM_004572.4:c.98C>A	p.P33H	.	NA	0	0.912	D	1	0.899	D	0.999	0.916	D	5.665	0.772	26.7	.	.	.	.	.	.	.	.	.	.	PM2PP3BP1	VUS
chr15	73322633	73322633	G	A	HCN4	NM_005477.3:c.3460C>T	p.R1154W	rs200896834	NA	0.001	0.784	D	1	0.899	D	0.924	0.642	D	4.878	0.655	24.9	0.0002	.	2.56e-05	3.33e-05	4.88e-05	0	4.62e-05	0	7.7e-05	.	PM2PP3	VUS
chr15	73322788	73322788	C	T	HCN4	NM_005477.3:c.3305G>A	p.R1102H	rs548130184	Uncertain_significance	0.056	0.381	T	0	0.026	B	0	0.013	B	2.004	0.302	16.24	0.000599	.	3.29e-05	0	4.89e-05	0	0.0001	0	.	.	BP4	VUS
chr15	73322843	73322843	T	C	HCN4	NM_005477.3:c.3250A>G	p.K1084E	.	NA	0.002	0.721	D	0.675	0.393	P	0.084	0.277	B	4.553	0.61	24.4	.	.	.	.	.	.	.	.	.	.	PM2PP3	VUS
chr15	73322887	73322887	C	T	HCN4	NM_005477.3:c.3206G>A	p.R1069Q	rs760242560	NA	0.065	0.363	T	0.753	0.414	P	0.016	0.166	B	2.787	0.396	21.3	.	.	1.32e-05	0	1.42e-05	0	7.22e-05	0	.	0.001577	PM2BP4	VUS
chr15	73323020	73323020	G	T	HCN4	NM_005477.3:c.3073C>A	p.L1025I	rs769698890	NA	0.045	0.408	D	0.267	0.299	B	0.024	0.19	B	0.624	0.154	8.319	.	.	9.84e-06	0.0001	1.4e-05	0.0007	0	0	.	.	BP4	VUS
chr15	73323293	73323293	G	A	HCN4	NM_005477.3:c.2800C>T	p.R934C	rs199638465	Conflicting_interpretations_of_pathogenicity	0	0.912	D	0.998	0.715	D	0.586	0.485	P	4.639	0.621	24.5	0.000799	.	0.0003	0.0007	0.0004	0	0.0006	0.0015	8.8e-05	0.00308	PP3	VUS
chr15	73323556	73323556	G	A	HCN4	NM_005477.3:c.2537C>T	p.P846L	rs747467877	Conflicting_interpretations_of_pathogenicity	0.001	0.784	D	0.981	0.577	D	0.397	0.426	B	4.328	0.579	24	.	.	9.95e-05	0.0004	4.89e-05	0	0.0001	0.0004	.	.	PM2PP3	VUS
chr15	73324209	73324209	C	T	HCN4	NM_005477.3:c.2023G>A	p.A675T	rs758215684	NA	0.04	0.421	D	1	0.899	D	0.987	0.759	D	4.357	0.583	24.1	.	.	4.07e-06	3.25e-05	.	.	8.3e-06	6.06e-05	.	.	PM1PM2PP3	VUS
chr15	73325018	73325018	C	T	HCN4	NM_005477.3:c.1915G>A	p.V639M	rs563194186	Uncertain_significance	0.016	0.518	D	0.903	0.478	P	0.503	0.459	P	4.969	0.668	25.1	0.000399	0.002	7.31e-05	0.0003	2.79e-05	0	8.24e-05	0.0004	.	.	PM1PP3	VUS
chr15	73325098	73325098	C	T	HCN4	NM_005477.3:c.1835G>A	p.R612H	rs528148663	NA	0.036	0.433	D	0.021	0.172	B	0.002	0.063	B	5.389	0.73	26	0.000399	.	4.87e-05	6.5e-05	2.79e-05	0.0003	3.3e-05	6.06e-05	.	.	PM2PP3	VUS
chr15	73325114	73325114	T	C	HCN4	NM_005477.3:c.1819A>G	p.M607V	rs758725633	NA	0.251	0.17	T	0.986	0.596	D	0.936	0.654	D	1.684	0.264	14.32	.	.	4.06e-06	3.25e-05	.	.	8.24e-06	6.06e-05	.	.	PM2BP4	VUS
chr15	73329704	73329704	C	T	HCN4	NM_005477.3:c.1459G>A	p.V487M	rs202037304	Conflicting_interpretations_of_pathogenicity	0.087	0.324	T	0.824	0.439	P	0.185	0.344	B	3.158	0.439	22.6	0.001198	0.0061	0.0008	0.0065	0.0002	0.0072	0.0008	0.006	.	0.002014	PM1BP4	VUS
chr15	73329761	73329761	C	T	HCN4	NM_005477.3:c.1402G>A	p.A468T	rs372632530	Uncertain_significance	0.001	0.784	D	0.998	0.715	D	0.884	0.61	P	5.665	0.772	26.7	.	.	1.63e-05	3.25e-05	1.4e-05	0	2.48e-05	0	7.7e-05	.	PM1PM2PP3	VUS
chr15	73343451	73343451	C	A	HCN4	NM_005477.3:c.1143G>T	p.K381N	.	NA	0.001	0.784	D	1	0.899	D	0.999	0.916	D	6.364	0.879	29.4	.	.	.	.	.	.	.	.	.	.	PM1PM2PP3	VUS
chr15	73343452	73343452	T	A	HCN4	NM_005477.3:c.1142A>T	p.K381M	.	NA	0	0.912	D	1	0.899	D	1	0.971	D	5.804	0.794	27.1	.	.	.	.	.	.	.	.	.	.	PM1PM2PP3	VUS
chr15	73367687	73367687	G	A	HCN4	NM_005477.3:c.584C>T	p.A195V	rs201375192	Conflicting_interpretations_of_pathogenicity	0.006	0.614	D	0.98	0.574	D	0.935	0.653	D	2.653	0.38	20.5	0.000799	.	0.0004	6.52e-05	0.0001	0.0003	0.0004	6.38e-05	.	.	PP3	VUS
chr15	73368147	73368147	C	T	HCN4	NM_005477.3:c.124G>A	p.D42N	.	NA	0	0.912	D	0.992	0.629	D	0.878	0.605	P	4.122	0.553	23.8	.	.	.	.	.	.	.	.	.	.	PM2PP3	VUS
chr17	70175247	70175247	G	C	KCNJ2	NM_000891.3:c.208G>C	p.A70P	.	NA	0.01	0.564	D	0.914	0.485	P	0.749	0.542	P	3.407	0.468	23	.	.	.	.	.	.	.	.	.	.	PM1PM2PP2PP3	Likely Pathogenic(V)
chr17	70175856	70175856	A	G	KCNJ2	NM_000891.3:c.817A>G	p.I273V	.	NA	0	0.912	D	0.999	0.764	D	0.997	0.85	D	2.523	0.364	19.62	.	.	.	.	.	.	.	.	.	.	PM1PM2PP2PP3	Likely Pathogenic(V)
chr19	35034093	35034093	G	A	SCN1B	NM_199037.5:c.802G>A	p.V268I	rs752552401	Uncertain_significance	0	0.912	D	0.206	0.282	B	0.058	0.25	B	1.474	0.24	13.17	.	.	9.46e-05	0.0005	1.4e-05	0.0003	0.0002	0.0005	.	.	PP2BP4	VUS
chr19	35039676	35039676	G	A	SCN1B	NM_001037.5:c.632G>A	p.C211Y	rs150721582	Conflicting_interpretations_of_pathogenicity	0	0.912	D	0.995	0.657	D	0.979	0.728	D	5.991	0.824	27.8	0.000399	.	0.0004	0.0004	0.0002	0.0003	0.0005	0.0004	0.0003	0.007049	PM2PP2PP3	VUS
chr19	49166126	49166126	G	A	TRPM4	NM_017636.4:c.178G>A	p.V60M	.	NA	0.067	0.359	T	0.981	0.581	D	0.459	0.446	P	4.226	0.566	23.9	.	.	.	.	.	.	.	.	.	.	PM2PP3	VUS
chr19	49166132	49166132	G	A	TRPM4	NM_017636.4:c.184G>A	p.D62N	rs747048335	NA	0.241	0.176	T	0.011	0.182	B	0.027	0.198	B	3.076	0.43	22.5	.	.	7.37e-05	0.0005	2.09e-05	0.001	0.0001	0.0007	.	.	BP4	VUS
chr19	49166202	49166202	G	A	TRPM4	NM_017636.4:c.254G>A	p.R85H	.	NA	0.005	0.632	D	0.765	0.899	P	0.147	0.736	B	3.388	0.466	23	.	.	4.51e-06	3.53e-05	.	.	.	.	.	.	PM2PP3	VUS
chr19	49167939	49167939	C	T	TRPM4	NM_017636.4:c.290C>T	p.T97M	rs570570457	Uncertain_significance	0.004	0.682	D	1	0.899	D	0.982	0.769	D	6.116	0.843	28.3	.	.	4.88e-05	0.0003	6.98e-06	0	9.89e-05	0.0005	.	.	PM1PM2PP3	VUS
chr19	49167972	49167972	G	A	TRPM4	NM_017636.4:c.323G>A	p.R108H	rs371414435	NA	0.136	0.274	T	0.032	0.189	B	0.005	0.104	B	1.943	0.294	15.85	.	.	3.66e-05	0.0002	6.28e-05	0.001	6.6e-05	0.0002	7.7e-05	.	PM1BP4	VUS
chr19	49168290	49168290	C	T	TRPM4	NM_017636.4:c.479C>T	p.T160M	rs372477657	NA	0.089	0.403	T	0.981	0.577	D	0.454	0.444	P	1.665	0.261	14.21	0.0002	.	9.75e-05	0	3.49e-05	0	6.6e-05	0	.	.	PM1PM2BP4	VUS
chr19	49168385	49168385	G	A	TRPM4	NM_017636.4:c.574G>A	p.G192S	.	NA	0.006	0.614	D	0.999	0.899	D	0.971	0.916	D	6.141	0.847	28.4	.	.	.	.	.	.	.	.	.	.	PM1PM2PP3	VUS
chr19	49168566	49168566	C	T	TRPM4	NM_017636.4:c.626C>T	p.A209V	rs765832900	NA	0.334	0.152	T	1	0.899	D	0.969	0.719	D	2.303	0.338	18.19	.	.	2.03e-05	0.0002	1.4e-05	0.0003	2.49e-05	0.0002	.	.	PM1PM2PP3	VUS
chr19	49168574	49168574	C	T	TRPM4	NM_017636.4:c.634C>T	p.R212W	rs759593186	Uncertain_significance	0.186	0.214	T	0.991	0.622	D	0.533	0.468	P	2.886	0.407	21.8	.	.	2.03e-05	9.75e-05	6.98e-06	0	3.32e-05	6.06e-05	.	.	PM1PM2PP3	VUS
chr19	49168617	49168617	A	G	TRPM4	NM_017636.4:c.677A>G	p.D226G	rs546529855	NA	0.004	0.654	D	1	0.899	D	0.998	0.875	D	6.217	0.858	28.7	0.0002	0.001	8.54e-05	0.0007	6.99e-06	0.0003	0.0001	0.0007	.	.	PM1PP3	VUS
chr19	49171410	49171410	A	T	TRPM4	NM_017636.4:c.850A>T	p.M284L	rs528764152	NA	0.129	0.296	T	0.444	0.341	B	0.151	0.364	B	1.945	0.295	15.87	0.0002	0.001	0.0002	0.0013	3.49e-05	0.0017	0.0002	0.0014	.	.	PM1BP4	VUS
chr19	49171417	49171417	C	T	TRPM4	NM_017636.4:c.857C>T	p.T286M	rs775793134	NA	0.006	0.614	D	0.022	0.227	B	0.002	0.181	B	2.524	0.365	19.62	.	.	7.31e-05	3.25e-05	0.0001	0	1.65e-05	0	.	0.000504	PM1PM2PP3	VUS
chr19	49171641	49171641	G	T	TRPM4	NM_017636.4:c.922G>T	p.A308S	.	NA	0.032	0.446	D	0.999	0.899	D	0.994	0.85	D	5.214	0.704	25.6	.	.	.	.	.	.	.	.	.	.	PM1PM2PP3	VUS
chr19	49172049	49172049	A	G	TRPM4	NM_017636.4:c.1091A>G	p.Y364C	.	NA	0.003	0.721	D	1	0.899	D	0.987	0.759	D	5.685	0.776	26.8	.	.	.	.	6.98e-06	0	.	.	.	.	PM2PP3	VUS
chr19	49182623	49182623	C	T	TRPM4	NM_017636.4:c.1309C>T	p.R437W	rs540785901	NA	0	0.912	D	0.916	0.899	P	0.312	0.759	B	6.907	0.932	33	.	.	8.14e-06	0	6.98e-06	0	8.28e-06	0	.	.	PM2PP3	VUS
chr19	49182705	49182705	A	C	TRPM4	NM_017636.4:c.1391A>C	p.Y464S	.	NA	0	0.912	D	0.392	0.899	B	0.358	0.754	B	4.765	0.639	24.7	.	.	.	.	.	.	.	.	.	.	PM2PP3	VUS
chr19	49182821	49182821	G	C	TRPM4	NM_017636.4:c.1507G>C	p.V503L	rs577719057	NA	0	0.912	D	0.993	0.899	D	0.982	0.79	D	4.967	0.668	25.1	0.000399	0.002	5.42e-05	0.0004	6.98e-06	0.0003	6.23e-05	0.0004	.	.	PP3	VUS
chr19	49190286	49190286	C	A	TRPM4	NM_017636.4:c.2098C>A	p.P700T	rs555253063	NA	0.093	0.315	T	0.997	0.715	D	0.916	0.688	D	5.101	0.687	25.3	0.000399	0.002	0.0002	0.0018	2.8e-05	0.0013	0.0003	0.002	.	.	PP3	VUS
chr19	49190287	49190287	C	T	TRPM4	NM_017636.4:c.2099C>T	p.P700L	.	NA	0.293	0.148	T	0.987	0.637	D	0.802	0.623	P	4.663	0.625	24.5	.	.	.	.	.	.	.	.	.	.	PM2PP3	VUS
chr19	49190305	49190305	G	A	TRPM4	NM_017636.4:c.2117G>A	p.R706H	rs79868934	NA	0.017	0.512	D	0.008	0.425	B	0.001	0.328	B	3.302	0.456	22.9	0.000399	.	2.03e-05	3.25e-05	6.98e-06	0	1.65e-05	6.07e-05	.	.	PM2PP3	VUS
chr19	49196518	49196518	C	G	TRPM4	NM_017636.4:c.2289C>G	p.C763W	rs200760537	Uncertain_significance	0.044	0.41	D	0.973	0.622	D	0.581	0.547	P	2.648	0.379	20.5	0.000399	.	0.0001	0.0003	0.0001	0.0003	0.0002	0.0001	.	.	PM2PP3	VUS
chr19	49196564	49196564	C	A	TRPM4	NM_017636.4:c.2335C>A	p.P779T	rs534427774	Uncertain_significance	0	0.912	D	1	0.899	D	0.996	0.916	D	5.74	0.784	26.9	0.0002	0.001	0.0002	0.0013	5.58e-05	0.0026	0.0004	0.0011	.	.	PP3	VUS
chr19	49196699	49196699	C	G	TRPM4	NM_017636.4:c.2470C>G	p.L824V	.	NA	0.003	0.682	D	0.981	0.629	D	0.832	0.609	P	3.804	0.514	23.4	.	.	.	.	.	.	.	.	.	.	PM1PM2PP3	VUS
chr19	49196855	49196855	C	T	TRPM4	NM_017636.4:c.2626C>T	p.L876F	rs748564289	NA	0.002	0.721	D	0.846	0.466	P	0.624	0.497	P	6.082	0.838	28.2	.	.	9.89e-06	0	.	.	2.16e-05	0	.	.	PM1PM2PP3	VUS
chr19	49200358	49200358	T	C	TRPM4	NM_017636.4:c.2704T>C	p.F902L	rs766643255	Uncertain_significance	0	0.912	D	0.235	0.899	B	0.136	0.916	B	6.282	0.868	29	.	.	2.03e-05	0.0002	6.98e-06	0.0003	1.65e-05	0.0001	.	.	PM1PM2PP3	VUS
chr19	49200647	49200647	G	A	TRPM4	NM_017636.4:c.2815G>A	p.V939M	rs749058255	NA	0.002	0.784	D	1	0.899	D	1	0.971	D	5.769	0.789	27	.	.	8.15e-06	6.5e-05	.	.	1.67e-05	0.0001	.	.	PM1PM2PP3	VUS
chr19	49210291	49210291	C	T	TRPM4	NM_017636.4:c.3214C>T	p.R1072W	rs777441494	NA	0	0.912	D	1	0.899	D	0.999	0.971	D	7.064	0.94	33	.	.	3.66e-05	0.0002	1.4e-05	0.0003	1.65e-05	0.0001	.	.	PM2PP3	VUS
chr19	49210758	49210758	C	G	TRPM4	NM_017636.4:c.3377C>G	p.S1126W	rs567938424	Conflicting_interpretations_of_pathogenicity	0.015	0.524	D	1	0.899	D	0.979	0.782	D	6.435	0.888	29.8	0.0002	0.001	0.0003	0.0026	3.49e-05	0.0007	0.0004	0.0027	.	.	PP3	VUS
chr19	49211230	49211230	C	T	TRPM4	NM_017636.4:c.3601C>T	p.P1201S	rs769645447	NA	0.733	0.063	T	1	0.899	D	0.994	0.875	D	3.499	0.478	23.1	.	.	4.91e-06	3.68e-05	.	.	3.63e-05	0.0002	.	.	PM2PP3	VUS
chr19	49211240	49211240	C	T	TRPM4	NM_017636.4:c.3611C>T	p.P1204L	rs150391806	Conflicting_interpretations_of_pathogenicity	0.212	0.195	T	0.885	0.498	P	0.106	0.357	B	4.157	0.557	23.8	0.001597	0.001	0.0035	0.0016	0.003	0	0.0038	0.0012	0.0022	0.005066	BP4PS3	VUS
chr20	33408539	33408539	C	G	SNTA1	NM_003098.3:c.1486G>C	p.A496P	.	Uncertain_significance	0.002	0.721	D	1	0.899	D	0.996	0.85	D	5.519	0.75	26.3	.	.	4.06e-06	0	6.98e-06	0	.	.	.	.	PM2PP3	VUS
chr20	33410168	33410168	G	A	SNTA1	NM_003098.3:c.1204C>T	p.R402W	rs373387978	Uncertain_significance	0.015	0.524	D	0.989	0.689	D	0.522	0.495	P	7.421	0.951	34	.	.	3.26e-05	3.25e-05	2.09e-05	0	5e-05	6.06e-05	7.7e-05	.	PM2PP3	VUS
chr20	33410284	33410284	T	G	SNTA1	NM_003098.3:c.1088A>C	p.E363A	rs147964932	Conflicting_interpretations_of_pathogenicity	0.132	0.265	T	0.97	0.604	D	0.681	0.546	P	4.283	0.574	24	0.0002	0.001	0.0003	0.0017	0.0002	0.002	0.0004	0.0018	0.0002	0.000507	PM1PP3	VUS
chr20	33417889	33417889	C	A	SNTA1	NM_003098.3:c.531G>T	p.K177N	.	NA	0.003	0.682	D	0.998	0.899	D	0.994	0.875	D	6.744	0.92	32	.	.	.	.	.	.	.	.	.	.	PM2PP3	VUS
chr20	33438897	33438897	G	A	SNTA1	NM_003098.3:c.440C>T	p.T147I	rs141724500	NA	0	0.912	D	0.991	0.622	D	0.895	0.759	P	5.852	0.802	27.3	.	.	3.25e-05	0.0003	1.4e-05	0.0007	8.24e-06	6.06e-05	.	.	PM1PP3	VUS
chr21	34370500	34370500	A	G	KCNE2	NM_172201.2:c.22A>G	p.T8A	rs2234916	Conflicting_interpretations_of_pathogenicity	0	0.912	D	0.999	0.764	D	0.991	0.782	D	4	0.538	23.6	0.001398	.	0.0037	0.0009	0.0038	0.001	0.0038	0.0009	0.0049	0.009063	PP3PM1PP2	VUS
chr21	34370609	34370609	A	G	KCNE2	NM_172201.2:c.131A>G	p.E44G	.	NA	0	0.912	D	1	0.899	D	0.999	0.916	D	6.299	0.87	29.1	.	.	.	.	.	.	.	.	.	.	PM1PM2PP2PP3	Likely Pathogenic(V)
chr21	34370648	34370648	T	C	KCNE2	NM_172201.2:c.170T>C	p.I57T	rs74315448	Conflicting_interpretations_of_pathogenicity	0.002	0.721	D	0.999	0.764	D	0.918	0.636	D	5.453	0.74	26.1	0.000799	.	0.0011	0.001	0.0006	0	0.0009	0.0009	0.0004	0.01007	PS3PM1PP2PP3	Likely Pathogenic(II)
chr21	34370707	34370707	C	T	KCNE2	NM_172201.2:c.229C>T	p.R77W	rs141423405	Uncertain_significance	0.011	0.555	D	0.995	0.657	D	0.727	0.533	P	7.201	0.945	34	.	.	7.72e-05	3.25e-05	4.19e-05	0	7.42e-05	0	0.0002	.	PM1PM2PP2PP3BS3	Likely Pathogenic(V)
chrX	109624597	109624597	C	G	KCNE5	NM_012282.4:c.424G>C	p.V142L	rs768958435	NA	0	0.912	D	0.994	0.647	D	0.79	0.559	P	4.809	0.645	24.8	0.00053	0.0028	0	0	.	.	0	0	.	.	PP3	VUS
chrX	109624767	109624767	C	A	KCNE5	NM_012282.4:c.254G>T	p.R85L	rs750897913	NA	0	0.912	D	1	0.899	D	0.993	0.797	D	7.229	0.946	34	.	.	1.72e-05	0.0002	.	.	2.87e-05	0.0002	.	.	PM2PP3	VUS
chrX	109624842	109624842	T	C	KCNE5	NM_012282.4:c.179A>G	p.Y60C	.	NA	0.003	0.682	D	0.999	0.764	D	0.943	0.662	D	4.685	0.628	24.6	.	.	.	.	.	.	.	.	.	.	PM2PP3	VUS
chrX	109624921	109624921	G	A	KCNE5	NM_012282.4:c.100C>T	p.R34C	rs377062108	NA	0.041	0.419	D	0.894	0.472	P	0.219	0.36	B	1.912	0.291	15.66	.	.	6.25e-05	0	3.75e-05	0	0.0001	0	9.6e-05	.	PM2PP3	VUS
HGVS: Human Genome Variation Society variant nomenclature; AA: amino acid; CLNSIG: ClinVar clinical significance; NA: not available; GME: Greater Middle East; 1000g: 1000 Genome; SAS: South Asians; gnomad: Genome Aggregation Database; esp6500: Exome Sequencing Project v.6500
