# Supplementary material for: 1029 genomes of self-declared healthy individuals from India reveal prevalent and clinically relevant cardiac ion channelopathy variants
Source: Hum Genomics. 2022 Aug 5;16:30. doi: 10.1186/s40246-022-00402-2 (PMC9354277; doi:10.1186/s40246-022-00402-2)
Supplement: Supplementary file 6 — Additional file 6: List of 30 predicted loss of function variations with their ACMG/AMP classification. [file 40246_2022_402_MOESM6_ESM.xlsx]

## Sheet: Additional_File_6
Additional File 6. List of 30 predicted loss-of-function variations with their ACMG/AMP classification
Chromosome	Position	Ref	Alt	Consequence	Gene_symbol	Gene	Feature	HGVSc	HGVSp	LoF	Variant Description	dbSNP ID	CLNSIG	CADD_phred	fathmm-MKL_coding_pred	MutationTaster_pred	1000g2015aug_all	1000g2015aug_sas	gnomAD_exome_ALL	gnomAD_exome_SAS	gnomAD_genome_All	gnomAD_genome_SAS	ExAC_ALL	ExAC_SAS	esp6500siv2_all	GME_AF	ACMG Attributes	ACMG annotation
chr1	115727023	C	A	stop_gained	CASQ2	ENSG00000118729	ENST00000261448	ENST00000261448.5:c.706G>T	ENSP00000261448.5:p.Glu236Ter	HC	NM_001232.3:c.706G>T	.	0	39	D	A	.	.	4.065e-06	3.252e-05	.	.	.	.	.	.	PVS1PM2PP3	Pathogenic (Ic)
chr1	115740726	A	G	splice_donor_variant	CASQ2$	ENSG00000118729	ENST00000261448	ENST00000261448.5:c.420+2T>C		HC	NM_001232.3:c.420+2T>C	.	0	23	D	D	.	.	.	.	.	.	.	.	.	.	PVS1PM2PP3	Pathogenic (Ic)
chr1	237469189	T	G	splice_donor_variant	RYR2$	ENSG00000198626	ENST00000366574	ENST00000366574.7:c.1708+2T>G		HC	NM_001035.3:c.1708+2T>G	.	0	24.3	D	D	.	.	.	.	.	.	.	.	.	.	PM2PP3	VUS
chr3	8745597	C	G	stop_gained	CAV3$	ENSG00000182533	ENST00000343849	ENST00000343849.2:c.186C>G	ENSP00000341940.2:p.Tyr62Ter	HC	NM_033337.2:c.186C>G	.	0	36	D	A	.	.	.	.	.	.	.	.	.	.	PM2PP3	VUS
chr3	38728733	G	A	stop_gained	SCN10A	ENSG00000185313	ENST00000644826	ENST00000644826.1:c.2449C>T	ENSP00000494789.1:p.Arg817Ter	HC	NM_006514.3:c.2449C>T	rs763084100	Uncertain_significance	32	N	A	.	.	1.628e-05	0	6.98e-06	0	8.24e-06	0	.	.	PM2PP3	VUS
chr4	113354556	A	T	stop_gained	ANK2$	ENSG00000145362	ENST00000357077	ENST00000357077.9:c.5938A>T	ENSP00000349588.4:p.Lys1980Ter	HC	NM_001148.6:c.5938A>T	.	0	38	D	A	.	.	.	.	.	.	.	.	.	.	PM2PP3	VUS
chr6	123218710	A	T	stop_gained	TRDN	ENSG00000186439	ENST00000334268	ENST00000334268.9:c.2081T>A	ENSP00000333984.5:p.Leu694Ter	HC	NM_006073.4:c.2081T>A	rs768858868	0	45	D	D	.	.	0.0001	0.001	3.5e-05	0.0016	0.0003	0.0016	.	.	PP3	VUS
chr6	123269848	C	T	splice_donor_variant	TRDN$	ENSG00000186439	ENST00000334268	ENST00000334268.9:c.1738+1G>A		HC	NM_006073.4:c.1738+1G>A	.	0	23.7	N	D	.	.	.	.	.	.	.	.	.	.	PM2PP3	VUS
chr6	123279056	G	A	stop_gained&splice_region_variant	TRDN	ENSG00000186439	ENST00000334268	ENST00000334268.9:c.1537C>T	ENSP00000333984.5:p.Gln513Ter	HC	NM_006073.4:c.1537C>T	rs757355311	Pathogenic	42	D	A	.	.	4.527e-05	0.0003	.	.	3.37e-05	0.0002	.	.	PVS1PM2PP3PP5	Pathogenic (Id)
chr6	123377900	T	C	splice_acceptor_variant	TRDN	ENSG00000186439	ENST00000334268	ENST00000334268.9:c.1187-2A>G		HC	NM_006073.4:c.1187-2A>G	rs578024729	Conflicting_interpretations_of_pathogenicity	24.8	D	D	0.00119808	0.0061	0.0006	0.0044	4.19e-05	0.002	0.002	0.0059	.	.	PVS1PP3	VUS
chr7	92001749	TAGAC	T	frameshift_variant	AKAP9$	ENSG00000127914	ENST00000356239	ENST00000356239.7:c.1836_1839del	ENSP00000348573.3:p.Asp612GlufsTer10	HC	NM_005751.4:c.1836_1839del	.	0	29.6	.	D	.	.	.	.	.	.	.	.	.	.	PM2PP3	VUS
chr7	92040673	G	T	splice_acceptor_variant	AKAP9	ENSG00000127914	ENST00000356239	ENST00000356239.7:c.4693-1G>T		HC	NM_005751.4:c.4693-1G>T	.	0	21.2	D	D	.	.	.	.	7.82e-06	0	.	.	.	.	PM2PP3	VUS
chr7	92093169	AAGAC	A	frameshift_variant	AKAP9	ENSG00000127914	ENST00000356239	ENST00000356239.7:c.9435_9438del	ENSP00000348573.3:p.Asp3145GlufsTer9	HC	NM_005751.4:c.9435_9438del	rs779441350	0	33	.	D	.	.	8.137e-06	3.25e-05	.	.	1.656e-05	0	.	.	PM2PP3	VUS
chr7	92095097	GA	G	frameshift_variant	AKAP9$	ENSG00000127914	ENST00000356239	ENST00000356239.7:c.9654del	ENSP00000348573.3:p.Glu3219SerfsTer27	HC	NM_005751.4:c.9654del	.	0	33	.	D	.	.	.	.	.	.	.	.	.	.	PM2PP3	VUS
chr10	18150881	A	T	splice_acceptor_variant	CACNB2	ENSG00000165995	ENST00000324631	ENST00000324631.12:c.121-2A>T		HC	NM_201596.3:c.121-2A>T	rs750396182	Uncertain_significance	24.2	D	D	.	.	0.0008	0.0014	0.0421	0.0458	8.71e-05	0	.	.	PP3BS1	VUS
chr10	18150882	G	T	splice_acceptor_variant	CACNB2	ENSG00000165995	ENST00000324631	ENST00000324631.12:c.121-1G>T		HC	NM_201596.3:c.121-1G>T	rs875989812	Uncertain_significance	24.7	D	D	.	.	0.0006	0.0012	0.0071	0.006	.	.	.	.	PP3	VUS
chr10	18150884	C	A	stop_gained&splice_region_variant	CACNB2	ENSG00000165995	ENST00000324631	ENST00000324631.12:c.122C>A	ENSP00000320025.7:p.Ser41Ter	HC	NM_201596.3:c.122C>A	.	0	37	D	A	.	.	.	.	0.0002	0	.	.	.	.	PM2PP3	VUS
chr11	2445456	TG	T	frameshift_variant	KCNQ1$	ENSG00000053918	ENST00000155840	ENST00000155840.11:c.360del	ENSP00000155840.2:p.Trp120Ter	HC	NM_000218.2:c.360del	.	0	32	.	D	.	.	.	.	.	.	.	.	.	.	PVS1PM2PP3	Pathogenic (Ic)
chr11	2570664	G	GTGGTCCGCCTC	frameshift_variant	KCNQ1	ENSG00000053918	ENST00000155840	ENST00000155840.11:c.524_534dup	ENSP00000155840.2:p.Gly179SerfsTer62	HC	NM_000218.2:c.524_534dup	rs879255588	Pathogenic/Likely_pathogenic	26.6	.	D	.	.	4.083e-06	3.249e-05	.	.	.	.	.	.	PVS1PP5PM2PP3	Pathogenic (Id)
chr12	21805251	CTA	C	frameshift_variant	ABCC9	ENSG00000069431	ENST00000261201	ENST00000261201.8:c.4571_4572del	ENSP00000261201.4:p.Leu1524CysfsTer4	HC	NM_005691.3:c.4571_4572del	rs778425119	Likely_benign	20.3	.	D	.	.	0.0005	0.0003	0.0004	0.0003	0.0006	0.0002	.	.	PS3BP6PP3	VUS
chr12	21863055	C	T	splice_acceptor_variant	ABCC9	ENSG00000069431	ENST00000261201	ENST00000261201.8:c.2238-1G>A		HC	NM_005691.3:c.2238-1G>A	rs141281214	Conflicting_interpretations_of_pathogenicity	27.1	D	D	0.00179712	0.0082	0.0015	0.0065	0.0007	0.0047	0.0016	0.0072	0.0008	.	PP3	VUS
chr12	21895316	CTG	C	splice_acceptor_variant&intron_variant	ABCC9	ENSG00000069431	ENST00000261201	ENST00000261201.8:c.1619-3_1619-2del		HC	NM_005691.3:c.1619-3_1619-2del	rs751999610	0	26.5	.	D	.	.	3.262e-05	0.0002	1.396e-05	0.0003	2.494e-05	0.0002	.	.	PM2PP3	VUS
chr12	32850907	G	A	stop_gained	PKP2	ENSG00000057294	ENST00000070846	ENST00000070846.10:c.1237C>T	ENSP00000070846.6:p.Arg413Ter	HC	NM_004572.3:c.1237C>T	rs372827156	Pathogenic	36	D	A	.	.	1.219e-05	3.249e-05	4.89e-05	0	1.65e-05	6.06e-05	7.7e-05	.	PVS1PM2PP1PP3PP5	Pathogenic (Id)
chr17	8289059	G	T	stop_gained	RANGRF	ENSG00000108961	ENST00000226105	ENST00000226105.11:c.181G>T	ENSP00000226105.6:p.Glu61Ter	HC	NM_016492.5:c.181G>T	rs140704891	Benign/Likely_benign	36	D	A	0.00119808	0.001	0.004	0.0017	0.0037	0.0023	0.004	0.0019	0.0042	0.00101	BP6PP3	VUS
chr19	49158236	CAT	C,GAT	frameshift_variant	TRPM4$	ENSG00000130529	ENST00000252826	ENST00000252826.10:c.71_72del	ENSP00000252826.4:p.Ile24SerfsTer2	HC	NM_017636.4:c.71_72del	.	0	.	.	D	.	.	.	.	.	.	.	.	.	.	PM2	VUS
chr19	49182889	G	A	stop_gained	TRPM4	ENSG00000130529	ENST00000252826	ENST00000252826.10:c.1575G>A	ENSP00000252826.4:p.Trp525Ter	HC	NM_017636.4:c.1575G>A	rs71352737	Conflicting_interpretations_of_pathogenicity	28.5	N	A	0.000399361	.	0.0015	0.0005	0.0016	0	0.0016	0.0008	0.0007	0.00253	PP3	VUS
chr19	49183091	CG	C	frameshift_variant	TRPM4$	ENSG00000130529	ENST00000252826	ENST00000252826.10:c.1624del	ENSP00000252826.4:p.Asp542ThrfsTer28	HC	NM_017636.4:c.1624del	.	0	13.82	.	D	.	.	.	.	.	.	.	.	.	.	PM2	VUS
chr19	49196708	G	T	stop_gained	TRPM4	ENSG00000130529	ENST00000252826	ENST00000252826.10:c.2479G>T	ENSP00000252826.4:p.Glu827Ter	HC	NM_017636.4:c.2479G>T	.	0	43	D	A	.	.	6.448e-06	0	.	.	.	.	.	.	PM2PP3	VUS
chr19	49201962	A	G	splice_acceptor_variant	TRPM4	ENSG00000130529	ENST00000252826	ENST00000252826.10:c.2954-2A>G		HC	NM_017636.4:c.2954-2A>G	.	0	23.7	D	D	.	.	8.176e-06	0	.	.	.	.	.	.	PM2PP3	VUS
chr21	34370829	TG	T	frameshift_variant	KCNE2	ENSG00000159197	ENST00000290310	ENST00000290310.3:c.354del	ENSP00000290310.2:p.Phe119SerfsTer16	HC	NM_172201.1:c.354del	rs750011503	0	23.4	.	D	.	.	4.875e-05	0.0004	.	.	5.803e-05	0.0004	.	.	PM2PP3	VUS
HGVS: Human Genome Variation Society variant nomenclature; AA: amino acid; CLNSIG: ClinVar clinical significance; LoF: loss of function annotation(LOFTEE), HC: high confidence; GME: Greater Middle East; 1000g: 1000 Genome; SAS: South Asians; gnomad: Genome Aggregation Database; esp6500: Exome Sequencing Project v.6500; $: Unique variations
