# Supplementary material for: 1029 genomes of self-declared healthy individuals from India reveal prevalent and clinically relevant cardiac ion channelopathy variants
Source: Hum Genomics. 2022 Aug 5;16:30. doi: 10.1186/s40246-022-00402-2 (PMC9354277; doi:10.1186/s40246-022-00402-2)
Supplement: Supplementary file 8 — Additional file 8: Allele frequencies of pathogenic and likely pathogenic cardiac channelopathy variants across different genomic datasets. [file 40246_2022_402_MOESM8_ESM.xlsx]

## Sheet: Additional_File_8
Additional File 8. Allele frequencies of pathogenic and likely pathogenic cardiac channelopathy variants across different genomic datasets
Gene	cDNA Change	AA Change	dbSNP ID	IndiGenomes	GenomeAsia100k	GME_All	Qatar1005-All	1000Genome_SAS	1000Genome_All	gnomAD_SAS	gnomAD_All	gnomAD_exome_SAS	gnomAD_exome_All	ESP6500siv2_All
KCND3	c.1348C>T	p.L450F	rs150401343	0.001	0.000287	0.00455	0.00603	0	0	0.0002071	7.226e-05	0.0001355	0.0001333	0
SCN5A	c.6046G>A	p.V2016M	rs762981322	0.0005	0	0	0	0	0	0	3.942e-05	0.0002573	3.3e-05	0
KCNH2	c.2467C>T	p.R823W	rs199473538	0.0005	0	0	0	0	0	0	6.587e-06	0	3.977e-06	0
KCNE3	c.49G>A	p.V17M	rs773287275	0.001	0	0	0	0	0	0	2.629e-05	0.0003593	4.775e-05	0
SCN3B	c.328G>A	p.V110I	rs147205617	0.0015	0.004312	0	0	0	0.000399	0.0006214	0.0003089	0.0004573	0.0003062	0.0004
CACNA1C	c.2573G>A	p.R858H	rs786205753	0.0005	0	0	0	0	0	0	0	0	0	0
KCNE2	c.170T>C	p.I57T	rs74315448	0.001	0.000575	0.01007	0.01807	0	0.000799	0.0006209	0.000703	0.0009472	0.001054	0.0004
CASQ2	c.706G>T	p.E236*	NA	0.0005	0	0	0	0	0	0	0	3.271e-05	3.98e-06	0
CASQ2	c.420+2T>C	NA	NA	0.0005	0	0	0	0	0	0	0	0	0	0
TRDN	c.1537C>T	p.Q513*	rs757355311	0.001	0	0	0	0	0	0	0	0.0002987	4.474e-05	0
PKP2	c.1237C>T	p.R413*	rs372827156	0.0005	0	0	0	0	0	0	4.601e-05	3.266e-05	1.194e-05	7.7e-05
KCNQ1	c.360del	p.W120*	NA	0.0005	0	0	0	0	0	0	0	0	0	0
KCNQ1	c.524_534dup	p.G179Sfs*62	rs879255588	0.0005	0	0	0	0	0	0	0	3.267e-05	4.007e-06	0
AA: amino acid; GME: Greater Middle East; 1000g: 1000 Genome; SAS: South Asians; gnomad: Genome Aggregation Database; esp6500: Exome Sequencing Project v.6500; NA: not available
